# Supplementary material for: Exploiting the Potential of Bioreactors for Creating Spatial Organization in the Soil Microbiome: A Strategy for Increasing Sustainable Agricultural Practices
Source: MDPI journal article supplement (doi:10.3390/microorganisms10071464), 2022-07-20
Supplement: s1 [file s1]

## Exploring soil microbiome self-assembling in bioreactors as a strategy to decrease chemical fertilizers in tomato plants

Carlos F. Gutiérrez<sup>1</sup>, Nicolás Rodríguez-Romero<sup>1</sup>, Siobhon Egan<sup>2</sup>, Elaine Holmes<sup>2</sup>, Janeth Sanabria<sup>1,2\*</sup>

Statics for chemical parameters measured in Bioreactors

**Table S1. Summary of average physical and chemical parameters.**

| Average values +/- Standard Deviation |    |                 |                |
|---------------------------------------|----|-----------------|----------------|
|                                       |    | Start a         | Steady-state b |
| OD600 (nm)                            | C- | 0               | 0              |
|                                       | C+ | 0.28 +/- 0.15   | 0.59 +/- 0.09  |
|                                       | R2 | 0.39 +/- 0.24   | 0.76 +/- 0.1   |
|                                       | R3 | 0.41 +/- 0.23   | 0.78 +/- 0.09  |
|                                       | R5 | 0.28 +/- 0.15   | 0.59 +/- 0.09  |
| Biomass (mg/L)                        | C- | 0               | 0              |
|                                       | C+ | 0.09 +/- 0.04   | 541 +/- 457    |
|                                       | R2 | 0.1 +/- 0.04    | 1114 +/- 164   |
|                                       | R3 | 0.1 +/- 0.05    | 888 +/- 797    |
|                                       | R5 | 0.8 +/- 0.04    | 1223 +/- 1305  |
| COD removal (%)                       | C- | 18.57 +/- 9.84  | 13.01 +/- 2.06 |
|                                       | C+ | 57.92 +/- 30.97 | 95.87 +/- 0.64 |
|                                       | R2 | 56.92 +/- 32.01 | 97.98 +/- 0.36 |
|                                       | R3 | 61.56 +/- 30.43 | 84.01 +/- 0.16 |
|                                       | R5 | 59 +/- 29       | 88.28 +/- 4.38 |
| TKN (mg/L)                            | C- | 0.95 +/- 1.94   | 0.83           |
|                                       | C+ | 0.14 +/- 0.13   | 13.75          |
|                                       | R2 | 0.16 +/- 0.16   | 15             |
|                                       | R3 | 0.07 +/- 0.10   | 6.87           |
|                                       | R5 | 0.88 +/- 1.67   | 23.96          |

<sup>a</sup> Start refers to the process of reactors inoculation until they reach a steady-state after 80 days of operation. <sup>b</sup> Steady-state refers to the process in which there are no significant changes in the values and are relatively constant over time.

**Table S1. Summary of average physical and chemical parameters.**

| Average values +/- Standard Deviation |    |               |                |
|---------------------------------------|----|---------------|----------------|
|                                       |    | Start a       | Steady-state b |
| N-NH4 (mg/L)                          | C- | 1.14 +/- 1.87 | 0.2            |
|                                       | C+ | 0.53 +/- 2.16 | 0.08           |
|                                       | R2 | 1.55 +/- 2.35 | 0.1            |
|                                       | R3 | 1.67 +/- 2.48 | 0.07           |
|                                       | R5 | 1.97 +/- 2.56 | 0.08           |
| N-NO3 (mg/L)                          | C- | 0.06 +/- 0.11 | 0.01           |
|                                       | C+ | 0.06 +/- 0.1  | 0.43           |
|                                       | R2 | 0.07 +/- 0.1  | 0.14           |
|                                       | R3 | 0.07 +/- 0.1  | 0.09           |
|                                       | R5 | 0.08 +/- 0.11 | 0.84           |
| N-NO2 (mg/L)                          | C- | 0.02 +/- 0.01 | 0.09           |
|                                       | C+ | 0.02 +/- 0.01 | 0.11           |
|                                       | R2 | 0.02 +/- 0.01 | 0.12           |
|                                       | R3 | 0.02 +/- 0.02 | 0.14           |
|                                       | R5 | 0.02 +/- 0.01 | 0.14           |
| N Fixed = TKN + NH4 + NO2 + NO3       | C- | 0.02 +/- 0.01 | 1.13           |
|                                       | C+ | 0.02 +/- 0.01 | 14.37          |
|                                       | R2 | 0.02 +/- 0.01 | 15.34          |
|                                       | R3 | 0.02 +/- 0.02 | 7.16           |
|                                       | R5 | 0.02 +/- 0.01 | 25.02          |

<sup>a</sup> Start refers to the process of reactors inoculation until they reach a steady-state after 80 days of operation. <sup>b</sup> Steady-state refers to the process in which there are no significant changes in the values and are relatively constant over time.

**Table S2. Anova Coefficients for transformed OD<sub>600</sub> response**

| Term             | Coef    | SE Coef. | T      | p     | VIF  |
|------------------|---------|----------|--------|-------|------|
| Constant         | -2,332  | 117      | -19,99 | 0     |      |
| Days             | 1,683   | 197      | 8,54   | 0     | 2,00 |
| Treatment R      | -99     | 165      | -0,60  | 548   | 3,42 |
| Days * Treatment |         |          |        |       |      |
| SAM              | 0,00560 | 0,00279  | 2,01   | 0,047 | 4,42 |

|                                                             |                                                        |
|-------------------------------------------------------------|--------------------------------------------------------|
| <b>Equation of regression for OD<sub>600</sub> response</b> |                                                        |
| <b>Treatments</b>                                           |                                                        |
| <b>OD C+</b>                                                | $\ln(\text{Response}) = -2,332 + 0,01683 \text{ Days}$ |
| <b>OD SAM</b>                                               | $\ln(\text{Response}) = -2,431 + 0,02243 \text{ Days}$ |

**Table S3. ANOVA for biomass response coefficients for transformed biomass (mg/L)**

| <b>Term</b>                                                               | <b>Coef</b>                                                      | <b>SE Coef.</b> | <b>T</b> | <b>p</b> | <b>VIF</b> |
|---------------------------------------------------------------------------|------------------------------------------------------------------|-----------------|----------|----------|------------|
| <b>Constant</b>                                                           | -1,716                                                           | 112             | -15,30   | 0        |            |
| <b>Days_1</b>                                                             | 767                                                              | 159             | 4,81     | 0        | 2,00       |
| <b>Treatment</b>                                                          |                                                                  |                 |          |          |            |
| <b>SAM</b>                                                                | 8                                                                | 159             | 0,05     | 960      | 2,14       |
| <b>Days_1*Treatment</b>                                                   |                                                                  |                 |          |          |            |
| <b>SAM</b>                                                                | 12                                                               | 225             | 0,05     | 958      | 3,14       |
| <b>Equation of regression for biomass response equation of regression</b> |                                                                  |                 |          |          |            |
| <b>Treatments</b>                                                         |                                                                  |                 |          |          |            |
| <b>C+</b>                                                                 | $-\text{Response}^{-0,145643} = -1,716 + 0,00767 \text{ Days}_1$ |                 |          |          |            |
| <b>SAM</b>                                                                | $-\text{Response}^{-0,145643} = -1,708 + 0,00779 \text{ Days}_1$ |                 |          |          |            |

**Table S4. ANOVA for COD % removal efficiency coefficients**

| <b>Term</b>                                                | <b>Coef</b>                                     | <b>SE Coef.</b> | <b>T</b> | <b>p</b> | <b>VIF</b> |
|------------------------------------------------------------|-------------------------------------------------|-----------------|----------|----------|------------|
| <b>Constant</b>                                            | 10,87                                           | 3,95            | 2,75     | 10       |            |
| <b>Days_1</b>                                              | 1,665                                           | 863             | 1,93     | 63       | 3,00       |
| <b>Treatments</b>                                          |                                                 |                 |          |          |            |
| <b>C+</b>                                                  | 6,46                                            | 5,59            | 1,16     | 257      | 4,76       |
| <b>SAM</b>                                                 | 2,02                                            | 5,59            | 0,36     | 720      | 4,76       |
| <b>Days_1*Treatments</b>                                   |                                                 |                 |          |          |            |
| <b>C+</b>                                                  | 868                                             | 122             | 7,11     | 0        | 5,43       |
| <b>SAM</b>                                                 | 889                                             | 122             | 7,29     | 0        | 5,43       |
| <b>Equation of regression for COD % removal efficiency</b> |                                                 |                 |          |          |            |
| <b>Treatments</b>                                          |                                                 |                 |          |          |            |
| <b>C+</b>                                                  | $\text{Response} = 17,32 + 1,0343 \text{ Days}$ |                 |          |          |            |
| <b>SAM</b>                                                 | $\text{Response} = 12,89 + 1,0556 \text{ Days}$ |                 |          |          |            |

**Table S5. Coefficients for transformed NT response**

| <b>Term</b>             | <b>Coef</b> | <b>SE Coef.</b> | <b>T</b> | <b>p</b> | <b>VIF</b> |
|-------------------------|-------------|-----------------|----------|----------|------------|
| <b>Constant</b>         | -1,53       | 1,01            | -1,51    | 0,165    |            |
| <b>Days_1</b>           | 0,0014      | 0,0117          | 0,12     | 0,905    | 3,00       |
| <b>Treatment</b>        |             |                 |          |          |            |
| <b>C+</b>               | -2,43       | 1,43            | -1,70    | 0,123    | 2,67       |
| <b>SAM</b>              | -0,33       | 1,43            | -0,23    | 0,823    | 2,67       |
| <b>Days_1*Treatment</b> |             |                 |          |          |            |
| <b>C+</b>               | 0,0234      | 0,0166          | 1,41     | 0,193    | 3,33       |
| <b>SAM</b>              | 0,0194      | 0,0166          | 1,17     | 0,272    | 3,33       |

**Equation of regression for transformed NT**

|                  |                                                         |
|------------------|---------------------------------------------------------|
| <b>Treatment</b> |                                                         |
| <b>C+</b>        | $\ln(\text{Response}) = -3,96 + 0,0248 \text{ Days\_1}$ |
| <b>SAM</b>       | $\ln(\text{Response}) = -1,85 + 0,0209 \text{ Days\_1}$ |

## Statics for chemical parameters measured in Bioreactors

**Table S6. Comparing fertilizer treatment effects of the tomato growth rates in the first gathering.**

Trend line equations and R square values

$$C- = 1,1117x - 0,3918 \quad R^2 = 0,9982$$

$$C+ = 1,4638x - 0,8408 \quad R^2 = 0,9802$$

$$P1 = 1,3189x + 0,3694 \quad R^2 = 0,9709$$

$$P2 = 1,5791x - 0,398 \quad R^2 = 0,9962$$

$$P3 = 1,2194x + 0,2286 \quad R^2 = 0,9841$$

**Table S7. Tukey multiple pairwise comparisons of Stem length in the first gathering.**

|    |     | diff       | lwr        | upr      | Padj             |
|----|-----|------------|------------|----------|------------------|
| C+ | -C  | -2.7857143 | -0.3451074 | 5.916536 | 0.0997065        |
| P1 | -C  | -2.1       | -1.0308216 | 5.230822 | 0.3163822        |
| P2 | -C  | -3.5142857 | 0.3834641  | 6.645107 | <b>0.0217685</b> |
| P3 | -C  | -1.7285714 | -1.4022502 | 4.859393 | 0.5080016        |
| P1 | -C+ | -0.6857143 | -3.8165359 | 2.445107 | 0.9680413        |
| P2 | -C  | +0.7285714 | -2.4022502 | 3.859393 | 0.9603222        |
| P3 | -C+ | -1.0571429 | -4.1879645 | 2.073679 | 0.8623589        |
| P2 | -P1 | 1.4142857  | -1.7165359 | 4.545107 | 0.6870557        |
| P3 | -P1 | -0.3714286 | -3.5022502 | 2.759393 | 0.9968156        |
| P3 | -P2 | -1.7857143 | -4.9165359 | 1.345107 | 0.4760769        |

**Table S8. Tukey multiple pairwise comparisons of Stem length in the first gathering.**

|              | diff       | lwr        | upr         | padj             |
|--------------|------------|------------|-------------|------------------|
| <b>C+-C-</b> | 1.3714286  | -0.4462773 | 3.18913445  | 0.2115377        |
| <b>P1-C-</b> | 2.0000000  | 0.1822941  | 3.81770588  | <b>0.0254190</b> |
| <b>P2-C-</b> | 2.5285714  | 0.7108655  | 4.34627731  | <b>0.0029723</b> |
| <b>P3-C-</b> | 0.7000000  | -1.1177059 | 2.51770588  | 0.7963371        |
| <b>P1-C+</b> | 0.6285714  | -1.1891345 | 2.44627731  | 0.8518911        |
| <b>P2-C+</b> | 1.1571429  | -0.660563  | 2.97484874  | 0.367049         |
| <b>P3-C+</b> | -0.6714286 | -2.4891345 | 1.14627731  | 0.8195156        |
| <b>P2-P1</b> | 0.5285714  | -1.2891345 | 2.34627731  | 0.9147368        |
| <b>P3-P1</b> | -1.3000000 | -3.1177059 | 0.51770588  | 0.2572031        |
| <b>P3-P2</b> | -1.8285714 | -3.6462773 | -0.01086555 | <b>0.0480815</b> |

**Table S9. Tukey multiple pairwise comparisons of Total length in the first gathering.**

|              | diff      | lwr        | upr       | padj             |
|--------------|-----------|------------|-----------|------------------|
| <b>C+-C-</b> | 3.600000  | -0.9800697 | 8.180070  | 0.1794070        |
| <b>P1-C-</b> | 4.000001  | -0.4800697 | 8.680070  | 0.0965278        |
| <b>P2-C-</b> | 6.042857  | 1.4627875  | 10.622927 | <b>0.0051454</b> |
| <b>P3-C-</b> | 2.428571  | -2.1514983 | 7.008641  | 0.5468984        |
| <b>P1-C+</b> | 0.500000  | -4.0800697 | 5.080070  | 0.9976950        |
| <b>P2-C+</b> | 2.442857  | -2.1372125 | 7.022927  | 0.5413182        |
| <b>P3-C+</b> | -1.171429 | -5.7514983 | 3.408641  | 0.9447722        |
| <b>P2-P1</b> | 1.942857  | -2.6372125 | 6.522927  | 0.7340233        |
| <b>P3-P1</b> | -1.671429 | -6.2514983 | 2.908641  | 0.8258500        |
| <b>P3-P2</b> | -3.614286 | -8.1943554 | 0.965784  | 0.1764419        |

**Table S10. Tukey multiple pairwise comparisons of Root width in the first gathering.**

|              | diff        | lwr         | upr         | P adj            |
|--------------|-------------|-------------|-------------|------------------|
| <b>C+-C-</b> | 0.32857143  | -0.8764859  | 1.53362876  | 0.9312654        |
| <b>P1-C-</b> | 0.78571429  | -0.41934304 | 1.99077161  | 0.3436463        |
| <b>P2-C-</b> | 1.62857143  | 0.4235141   | 2.83362876  | <b>0.0040306</b> |
| <b>P3-C-</b> | 0.38571429  | -0.81934304 | 1.59077161  | 0.8835997        |
| <b>P1-C+</b> | 0.45714286  | -0.74791447 | 1.66220019  | 0.8049507        |
| <b>P2-C+</b> | 1.30000000  | 0.09494267  | 2.50505733  | <b>0.0294874</b> |
| <b>P3-C+</b> | 0.05714286  | -1.14791447 | 1.26220019  | 0.9999144        |
| <b>P2-P1</b> | 0.84285714  | -0.36220019 | 2.04791447  | 0.2772783        |
| <b>P3-P1</b> | -0.4000000  | -1.60505733 | 0.80505733  | 0.8694778        |
| <b>P3-P2</b> | -1.24285714 | -2.44791447 | -0.03779981 | <b>0.0406474</b> |

**Table S11. Tukey multiple pairwise comparisons of Root volume in the first gathering.**

|              | diff        | lwr          | upr       | padj             |
|--------------|-------------|--------------|-----------|------------------|
| <b>C+-C-</b> | 2.4549360   | -10.64491224 | 15.554784 | 0.9819044        |
| <b>P1-C-</b> | 6.6637450   | -6.43610324  | 19.763593 | 0.5856284        |
| <b>P2-C-</b> | 15.6326016  | 2.53275336   | 28.732450 | <b>0.0131211</b> |
| <b>P3-C-</b> | 2.9239694   | -10.17587884 | 16.023818 | 0.9657966        |
| <b>P1-C+</b> | 4.2088090   | -8.89103924  | 17.308657 | 0.8822008        |
| <b>P2-C+</b> | 13.1776656  | 0.07781736   | 26.277514 | <b>0.0480932</b> |
| <b>P3-C+</b> | 0.4690334   | -12.63081484 | 13.568882 | 0.9999720        |
| <b>P2-P1</b> | 8.9688566   | -4.13099164  | 22.068705 | 0.2970215        |
| <b>P3-P1</b> | -3.7397756  | -16.83962384 | 9.360073  | 0.9197947        |
| <b>P3-P2</b> | -12.7086322 | -25.80848044 | 0.391216  | <b>0.0606439</b> |

**Table S12. Comparing fertilizer treatment effects of the tomato growth rates in the second gathering.**

|                                                                                                                            |
|----------------------------------------------------------------------------------------------------------------------------|
| <b>C+</b> = -0,002x <sup>4</sup> + 0,0718x <sup>3</sup> - 0,3251x <sup>2</sup> + 0,2514x + 3,6092 R <sup>2</sup> = 0,9978  |
| <b>P1</b> = -0,0021x <sup>4</sup> + 0,093x <sup>3</sup> - 0,8747x <sup>2</sup> + 3,8588x - 2,0546 R <sup>2</sup> = 0,9992  |
| <b>P2</b> = -0,0049x <sup>4</sup> + 0,2217x <sup>3</sup> - 2,7156x <sup>2</sup> + 12,122x - 12,06 R <sup>2</sup> = 0,9976  |
| <b>P3</b> = -0,0007x <sup>4</sup> + 0,0227x <sup>3</sup> + 0,2141x <sup>2</sup> - 1,9876x + 4,8939 R <sup>2</sup> = 0,9955 |
