# Supplementary material for: Exploiting the Potential of Bioreactors for Creating Spatial Organization in the Soil Microbiome: A Strategy for Increasing Sustainable Agricultural Practices
Source: MDPI journal article supplement (doi:10.3390/microorganisms10071464), 2022-07-20
Supplement: s1 [file s1]

# Exploiting the potential of bioreactors for creating spatial organisation in the soil microbiome: A strategy for increasing sustainable agricultural practices

**Authors:** Carlos F. Gutiérrez<sup>1</sup>, Nicolás Rodríguez-Romero<sup>1</sup>, Siobhon Egan<sup>2</sup>, Elaine Holmes<sup>2</sup> and Janeth Sanabria<sup>1,2</sup> \*

1. Environmental Microbiology and Biotechnology Laboratory, Engineering School of Environmental & Natural Resources, Engineering Faculty, Universidad del Valle – Meléndez campus, Cali, Colombia.
  2. Australian National Phenome Center, Murdoch University, Perth Australia
- Correspondence: [janeth.sanabria@correounivalle.edu.co](mailto:janeth.sanabria@correounivalle.edu.co)

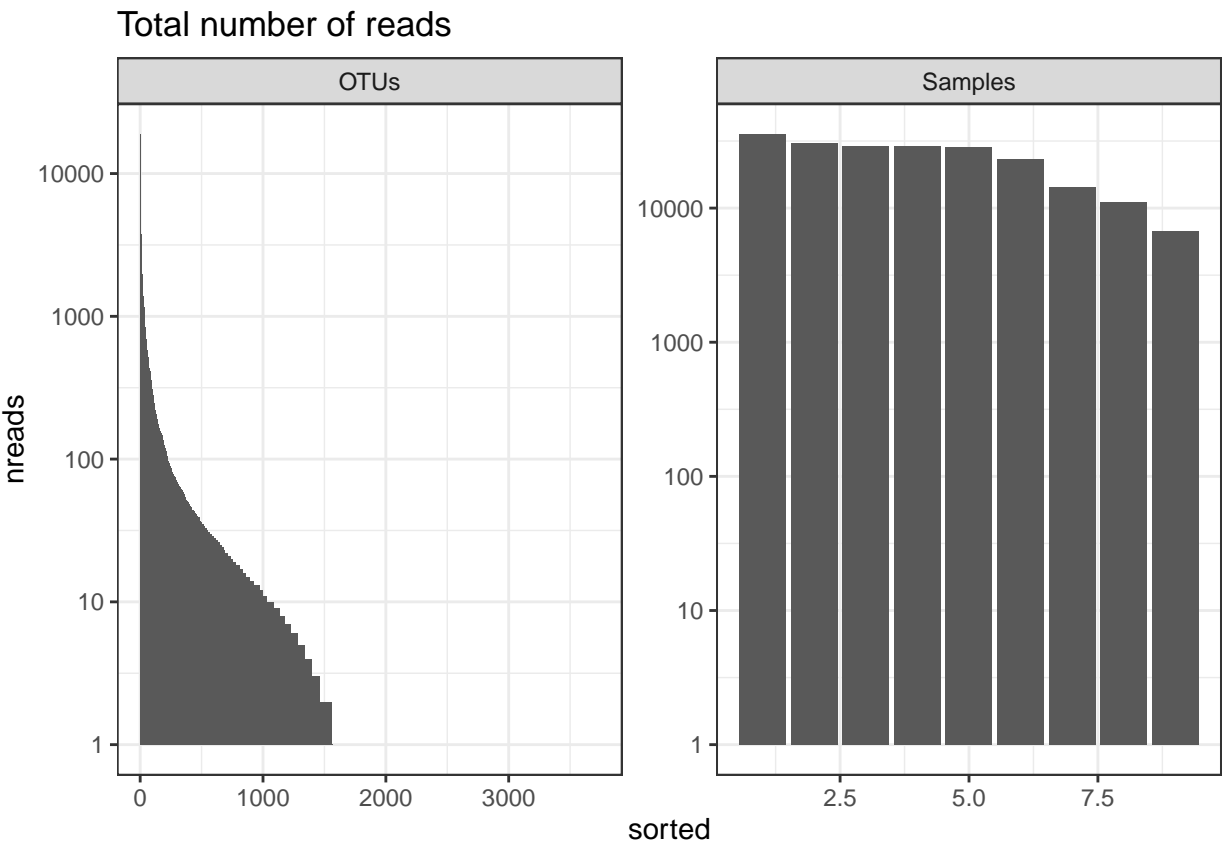

Figure S1: Number of reads obtained after bioinformatic processing shown as (a) number of reads per OTU (or amplicon sequence variants - ASVs) and (b) number of reads per sample.

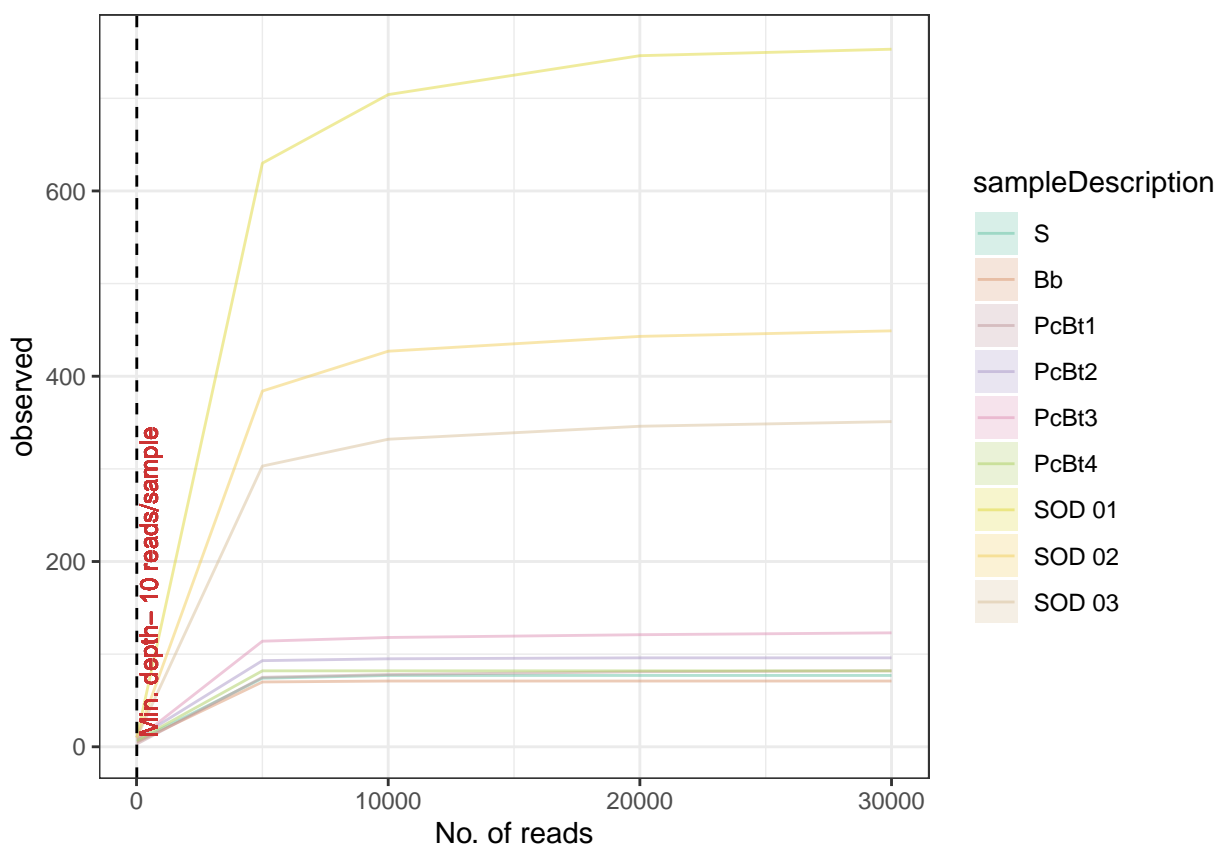

Figure S2: Rarefaction of final taxonomic data from microbiome analysis

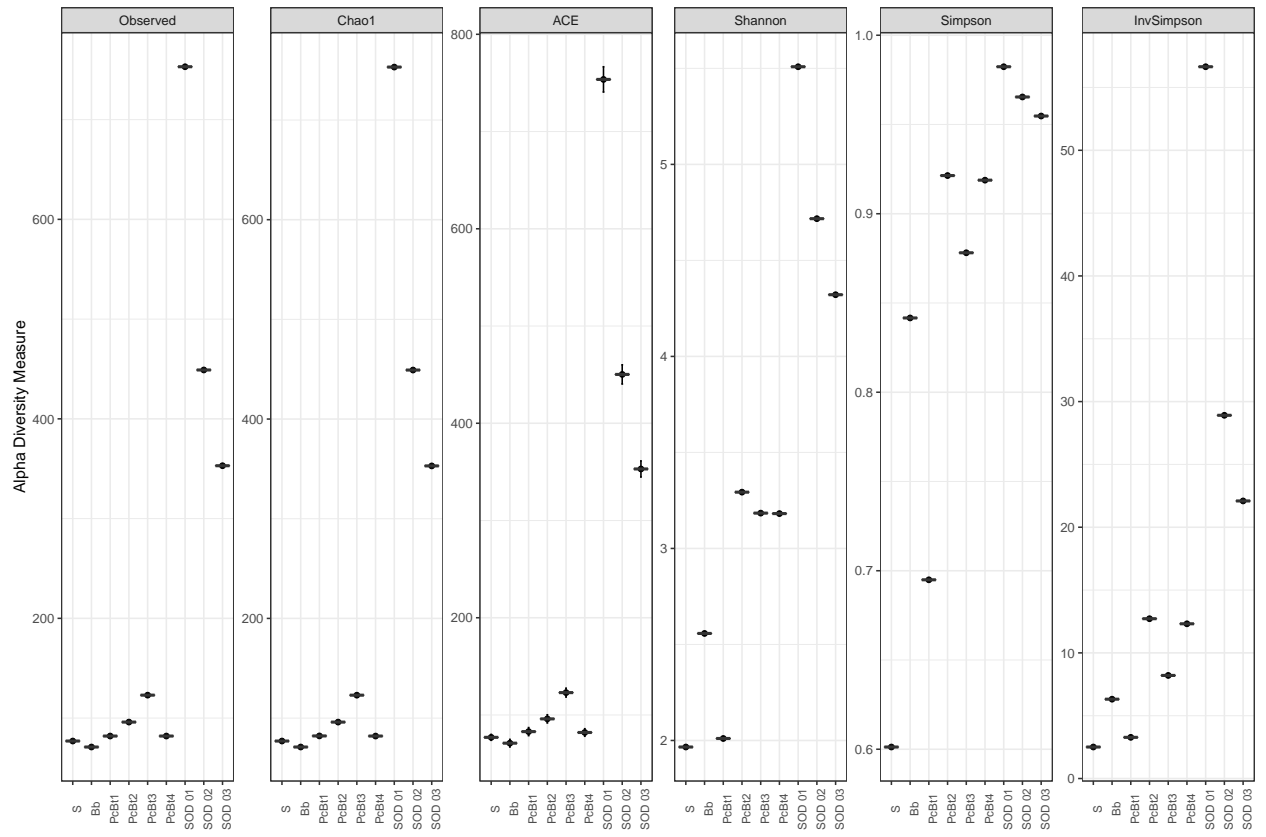

Figure S3: Alpha diversity analysis using Observed, Chao1, ACE, Shannon, Simpson and Inverse Simpson metrics

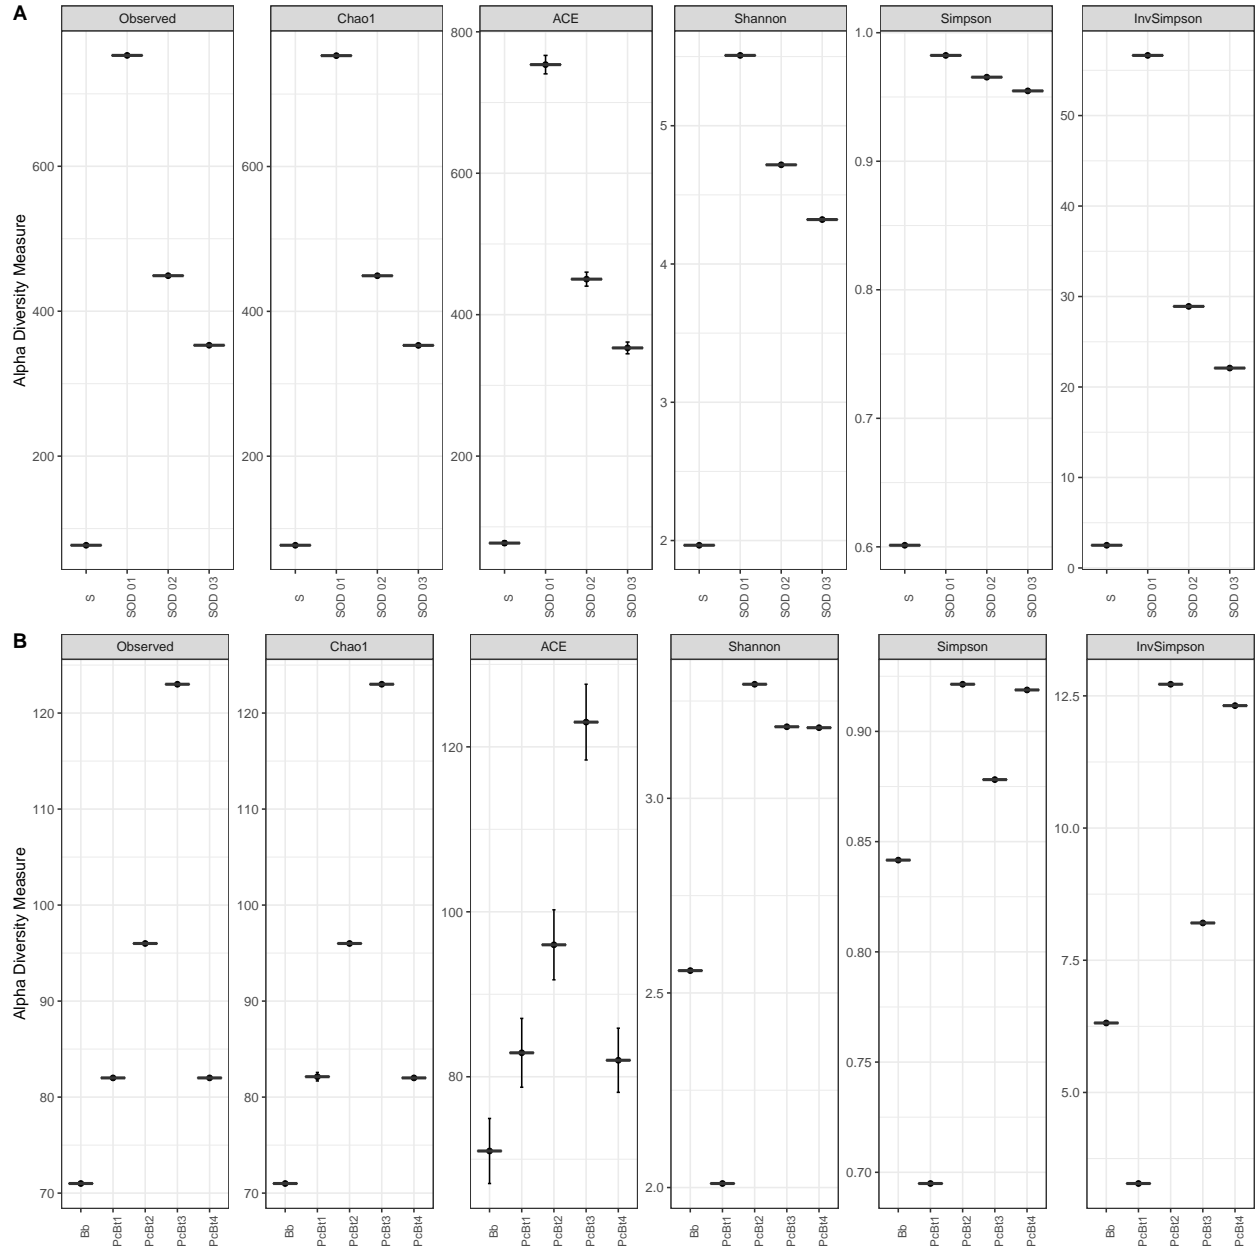

Figure S4: Alpha diversity analysis using Observed, Chao1, ACE, Shannon, Simpson and Inverse Simpson metrics for subset data

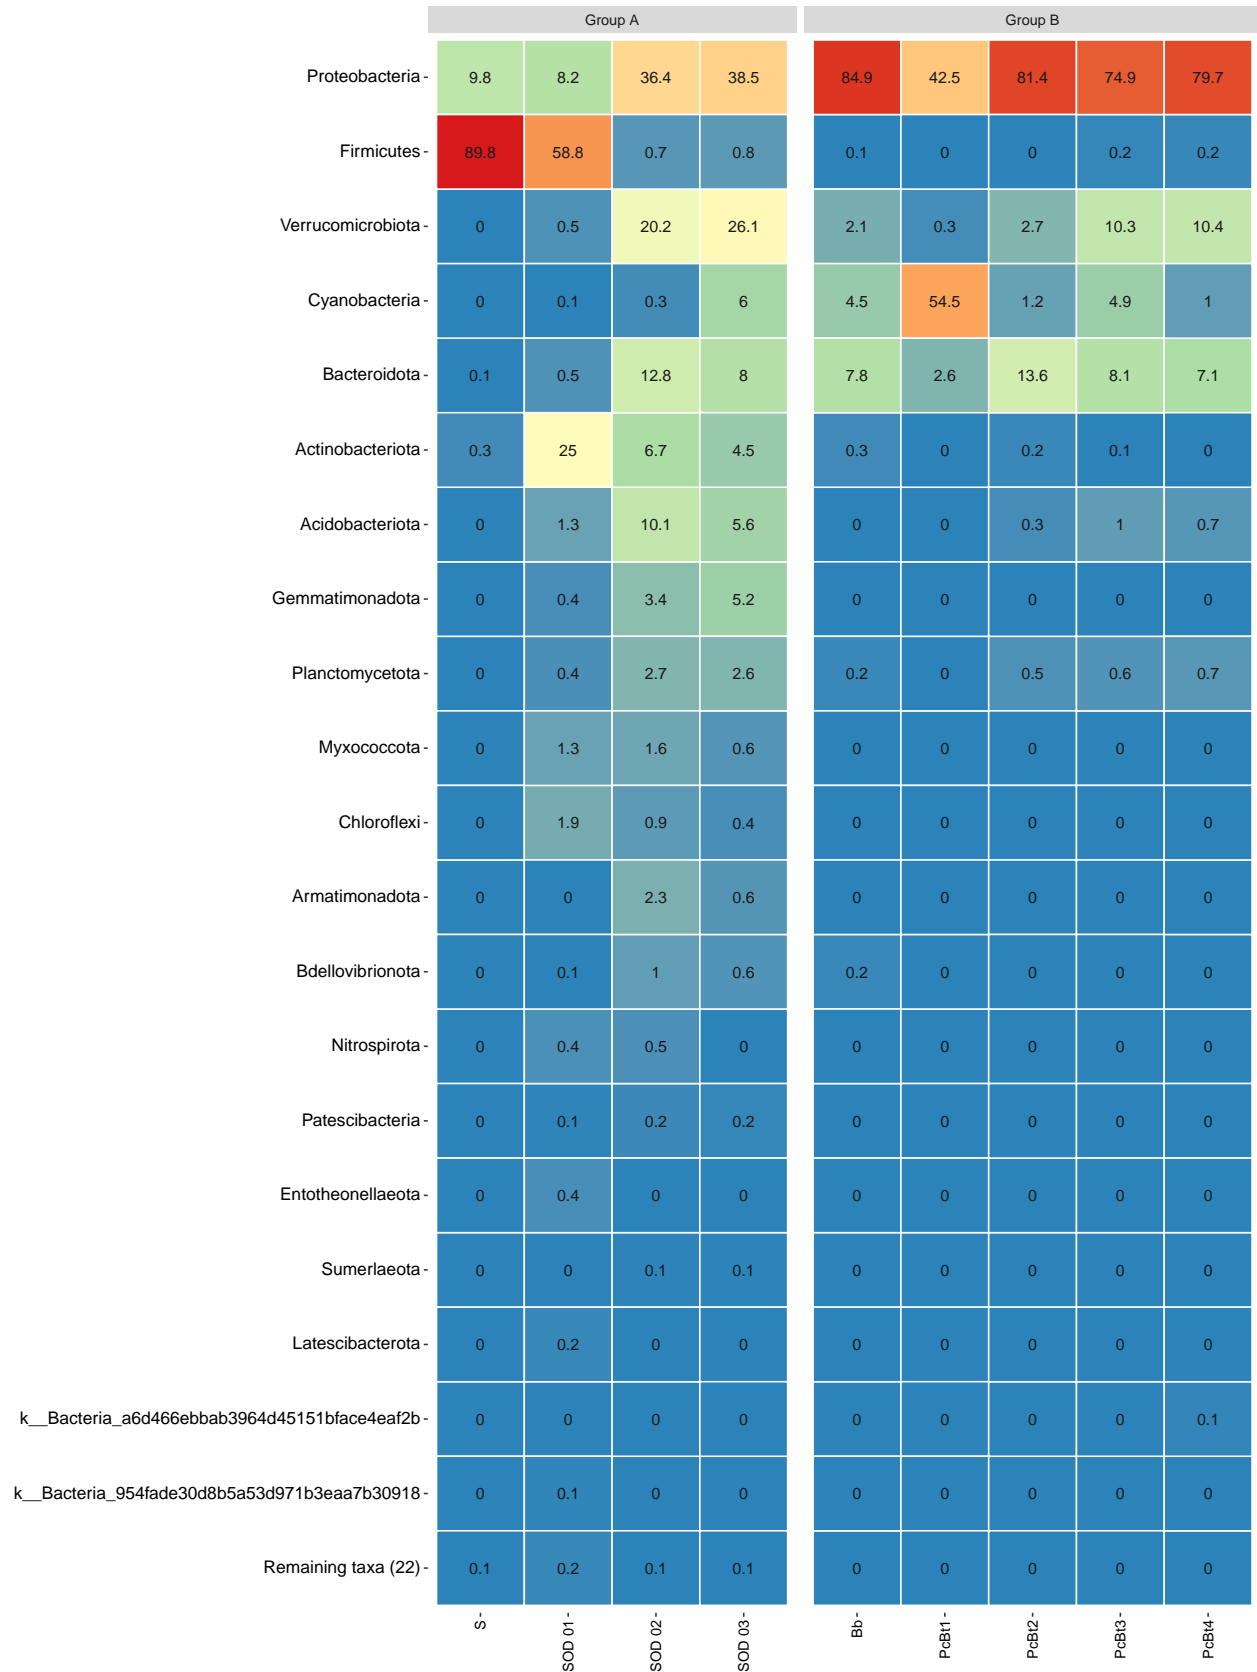

Figure S5: Heatmap showing relative abundance of top 20 phylum taxa identified from samples

|                                                  | Group A |        |        |        | Group B |      |      |      |      |
|--------------------------------------------------|---------|--------|--------|--------|---------|------|------|------|------|
| Alphaproteobacteria -                            | 0.9     | 7      | 23.9   | 25.7   | 52      | 14.6 | 52.6 | 55.7 | 60.9 |
| Gammaproteobacteria -                            | 8.9     | 1.2    | 12.5   | 12.8   | 32.9    | 28   | 28.8 | 19.2 | 18.8 |
| Clostridia -                                     | 74.1    | 9.8    | 0      | 0      | 0.1     | 0    | 0    | 0    | 0    |
| Verrucomicrobiae -                               | 0       | 0.5    | 20.2   | 26     | 2       | 0.3  | 2.3  | 10.1 | 10.1 |
| Vampirivibrionia -                               | 0       | 0.1    | 0.1    | 5.5    | 4.4     | 54.5 | 0.8  | 0.2  | 0.4  |
| Bacilli -                                        | 14.1    | 46     | 0.7    | 0.8    | 0.1     | 0    | 0    | 0    | 0    |
| Bacteroidia -                                    | 0.1     | 0.5    | 12.2   | 7.9    | 7.8     | 2.6  | 13.6 | 8.1  | 7.1  |
| Actinobacteria -                                 | 0.3     | 14.4   | 6.1    | 4.4    | 0.3     | 0    | 0.2  | 0.1  | 0    |
| Acidobacteriæ -                                  | 0       | 0.2    | 7.3    | 4.1    | 0       | 0    | 0.3  | 1    | 0.7  |
| Cyanobacteria -                                  | 0       | 0      | 0.1    | 0.6    | 0.1     | 0    | 0.4  | 4.7  | 0.6  |
| Planctomycetes -                                 | 0       | 0.2    | 2.2    | 2.1    | 0.2     | 0    | 0.5  | 0.6  | 0.7  |
| Thermoleophilia -                                | 0       | 5.8    | 0.2    | 0.1    | 0       | 0    | 0    | 0    | 0    |
| Longimicrobia -                                  | 0       | 0      | 0.9    | 4.1    | 0       | 0    | 0    | 0    | 0    |
| Gemmatimonadetes -                               | 0       | 0.4    | 2.5    | 1.1    | 0       | 0    | 0    | 0    | 0    |
| Acidimicrobiia -                                 | 0       | 2.9    | 0.4    | 0      | 0       | 0    | 0    | 0    | 0    |
| Fimbriimonadia -                                 | 0       | 0      | 2.3    | 0.6    | 0       | 0    | 0    | 0    | 0    |
| Polyangia -                                      | 0       | 1.1    | 1.3    | 0.4    | 0       | 0    | 0    | 0    | 0    |
| Vicinamibacteria -                               | 0       | 0.6    | 1.4    | 0.9    | 0       | 0    | 0    | 0    | 0    |
| Blastocatellia -                                 | 0       | 0.2    | 1.4    | 0.7    | 0       | 0    | 0    | 0    | 0    |
| Bdellovibrionia -                                | 0       | 0      | 0.7    | 0.4    | 0.2     | 0    | 0    | 0    | 0    |
| MB-A2-108 -                                      | 0       | 1.3    | 0      | 0      | 0       | 0    | 0    | 0    | 0    |
| Chlamydiae -                                     | 0       | 0      | 0      | 0.1    | 0.1     | 0    | 0.4  | 0.2  | 0.3  |
| Desulfotobacteriia -                             | 0       | 1.2    | 0      | 0      | 0       | 0    | 0    | 0    | 0    |
| Phycisphaerae -                                  | 0       | 0.1    | 0.4    | 0.5    | 0       | 0    | 0    | 0    | 0    |
| TK10 -                                           | 0       | 0.3    | 0.5    | 0.2    | 0       | 0    | 0    | 0    | 0    |
| Limnochordia -                                   | 0       | 1      | 0      | 0      | 0       | 0    | 0    | 0    | 0    |
| Nitrospiria -                                    | 0       | 0.4    | 0.5    | 0      | 0       | 0    | 0    | 0    | 0    |
| p__Firmicutes_fa1ddfd395fb61f0bbc60e2858221cc6 - | 0.8     | 0      | 0      | 0      | 0       | 0    | 0    | 0    | 0    |
| KD4-96 -                                         | 0       | 0.7    | 0      | 0      | 0       | 0    | 0    | 0    | 0    |
| p__Firmicutes_d0a314da17929fe570aff8a6f0d85ebc - | 0.8     | 0      | 0      | 0      | 0       | 0    | 0    | 0    | 0    |
| Remaining taxa (64) -                            | 0.1     | 3.9    | 2      | 1      | 0       | 0    | 0    | 0.1  | 0.3  |
|                                                  | s       | SOD 01 | SOD 02 | SOD 03 | Bb      | PcB1 | PcB2 | PcB3 | PcB4 |

Figure S6: Heatmap showing relative abundance of top 30 class identified from samples

|                                                   | Group A |        |        |        | Group B |       |       |       |       |
|---------------------------------------------------|---------|--------|--------|--------|---------|-------|-------|-------|-------|
| Rhizobiales -                                     | 0.1     | 4.5    | 12.4   | 11     | 37.8    | 4.8   | 10    | 11.2  | 25.1  |
| Sphingomonadales -                                | 0.3     | 0.7    | 4.5    | 3.6    | 8.7     | 2.9   | 31.2  | 35.3  | 20.4  |
| Clostridiales -                                   | 74.1    | 5.5    | 0      | 0      | 0.1     | 0     | 0     | 0     | 0     |
| Burkholderiales -                                 | 0.2     | 0.3    | 7.2    | 5.9    | 31      | 23.6  | 4.5   | 4     | 2.3   |
| Obscuribacterales -                               | 0       | 0.1    | 0      | 5.5    | 4.4     | 54.5  | 0.8   | 0.2   | 0.4   |
| Opitutales -                                      | 0       | 0      | 17.7   | 18.6   | 0       | 0     | 0     | 0     | 0     |
| Xanthomonadales -                                 | 0.2     | 0.1    | 1.8    | 2.3    | 1.6     | 1.7   | 3.7   | 10.3  | 12.7  |
| Bacillales -                                      | 12.7    | 14.1   | 0.2    | 0.1    | 0.1     | 0     | 0     | 0     | 0     |
| Reyranellales -                                   | 0       | 0.3    | 1.5    | 1.5    | 1       | 1.1   | 4.4   | 3.7   | 10.8  |
| Verrucomicrobiales -                              | 0       | 0      | 1.6    | 6.5    | 0       | 0     | 0.1   | 6.5   | 7.9   |
| Brevibacillales -                                 | 0       | 19.5   | 0.1    | 0.1    | 0       | 0     | 0     | 0     | 0     |
| c__Bacteroidia_783535a03c2e41866d160d349546fd1b - | 0       | 0.1    | 0.1    | 0.1    | 4.6     | 0.2   | 6.6   | 4.4   | 3.6   |
| Chitinophagales -                                 | 0       | 0.3    | 4.4    | 4.5    | 1.8     | 1.6   | 4.4   | 1.3   | 1.4   |
| Enterobacterales -                                | 6.5     | 0.3    | 0      | 0      | 0.1     | 0     | 8.3   | 2.5   | 0.8   |
| Salinisphaerales -                                | 0       | 0      | 0      | 0.8    | 0       | 2.7   | 11.9  | 1.4   | 0.7   |
| Caulobacterales -                                 | 0       | 0.2    | 0.8    | 1.5    | 3.6     | 0.6   | 2.7   | 2.4   | 1.9   |
| Cytophagales -                                    | 0       | 0.1    | 6.7    | 2.4    | 1       | 0.8   | 0.3   | 0.2   | 0.4   |
| Chthoniobacterales -                              | 0       | 0.3    | 0.2    | 0.4    | 2       | 0.3   | 2.2   | 3.6   | 2.2   |
| Pseudomonadales -                                 | 2       | 0.2    | 2.2    | 2.7    | 0       | 0     | 0.2   | 0.9   | 2.3   |
| Micromonosporales -                               | 0       | 10.3   | 0      | 0      | 0       | 0     | 0     | 0     | 0     |
| Paenibacillales -                                 | 1.4     | 7.2    | 0.4    | 0.5    | 0       | 0     | 0     | 0     | 0     |
| Ferrovibrionales -                                | 0       | 0      | 0.1    | 1.1    | 0       | 3.6   | 2.6   | 0.8   | 0.5   |
| Micrococcales -                                   | 0.3     | 0.3    | 4.2    | 2.8    | 0.3     | 0     | 0.2   | 0.1   | 0     |
| Bryobacterales -                                  | 0       | 0.1    | 4.4    | 2.3    | 0       | 0     | 0     | 0     | 0     |
| Chloroplast -                                     | 0       | 0      | 0.1    | 0.6    | 0.1     | 0     | 0.4   | 4.7   | 0.6   |
| Rhodospirillales -                                | 0       | 0      | 2.1    | 2.9    | 0       | 0     | 0     | 0     | 0     |
| Longimicrobiales -                                | 0       | 0      | 0.9    | 4.1    | 0       | 0     | 0     | 0     | 0     |
| Flavobacteriales -                                | 0       | 0.1    | 0.1    | 0.1    | 0.1     | 0     | 1.7   | 1.6   | 1.3   |
| Gaiellales -                                      | 0       | 4.6    | 0      | 0      | 0       | 0     | 0     | 0     | 0     |
| Isosphaerales -                                   | 0       | 0      | 1.3    | 1.7    | 0.1     | 0     | 0.5   | 0.5   | 0.5   |
| Gemmatimonadales -                                | 0       | 0.4    | 2.5    | 1.1    | 0       | 0     | 0     | 0     | 0     |
| Propionibacteriales -                             | 0       | 1.9    | 0.9    | 1.1    | 0       | 0     | 0     | 0     | 0     |
| Paracaedibacteriales -                            | 0       | 0      | 0.2    | 0.6    | 0.3     | 1.1   | 0.4   | 0.9   | 0.3   |
| Azospirillales -                                  | 0       | 0      | 0.3    | 0.5    | 0       | 0     | 0.8   | 0.9   | 1.3   |
| Solibacterales -                                  | 0       | 0.1    | 1.9    | 1.2    | 0       | 0     | 0.2   | 0     | 0     |
| Sphingobacteriales -                              | 0       | 0.1    | 1      | 0.8    | 0.3     | 0     | 0.4   | 0.7   | 0.2   |
| Lachnospirales -                                  | 0       | 3.1    | 0      | 0      | 0       | 0     | 0     | 0     | 0     |
| Acidobacteriae -                                  | 0       | 0      | 0.6    | 0.6    | 0       | 0     | 0.2   | 1     | 0.6   |
| Fimbriimonadales -                                | 0       | 0      | 2.3    | 0.6    | 0       | 0     | 0     | 0     | 0     |
| Vicinamibacteriales -                             | 0       | 0.5    | 1.4    | 0.9    | 0       | 0     | 0     | 0     | 0     |
| Remaining taxa (190) -                            | 2.2     | 24.9   | 14.1   | 8.9    | 1.2     | 0.6   | 1.2   | 1     | 1.9   |
|                                                   | s       | SOD 01 | SOD 02 | SOD 03 | Bb      | PcB11 | PcB12 | PcB13 | PcB14 |

Figure S7: Heatmap showing relative abundance of top 40 order taxa identified from samples

|                                                 |                              | Group A |        |        |        | Group B |       |       |       |       |
|-------------------------------------------------|------------------------------|---------|--------|--------|--------|---------|-------|-------|-------|-------|
| c__Bacteroidia_783535a03c2e41866d160d349546fd1b | Sphingomonadaceae -          | 0.3     | 0.7    | 4.5    | 3.6    | 8.7     | 2.9   | 31.2  | 35.3  | 20.4  |
|                                                 | Clostridiaceae -             | 74.1    | 4.5    | 0      | 0      | 0.1     | 0     | 0     | 0     | 0     |
|                                                 | Obscuribacteraceae -         | 0       | 0.1    | 0      | 5.5    | 4.4     | 54.5  | 0.8   | 0.2   | 0.4   |
|                                                 | Rhodocyclaceae -             | 0       | 0      | 0.6    | 2.5    | 18.7    | 22.8  | 2.3   | 1.9   | 1.2   |
|                                                 | Beijerinckiaceae -           | 0       | 0.5    | 2.4    | 1.8    | 34.2    | 2.5   | 2.2   | 1.4   | 0.8   |
|                                                 | Xanthobacteraceae -          | 0       | 2.9    | 3.7    | 4      | 1       | 0.7   | 4.9   | 5.9   | 17.9  |
|                                                 | Opitutaceae -                | 0       | 0      | 17.7   | 18.6   | 0       | 0     | 0     | 0     | 0     |
|                                                 | Xanthomonadaceae -           | 0.2     | 0.1    | 1.7    | 2.2    | 1.6     | 1.7   | 3.7   | 10.3  | 12.7  |
|                                                 | Reyraneliaceae -             | 0       | 0.3    | 1.5    | 1.5    | 1       | 1.1   | 4.4   | 3.7   | 10.8  |
|                                                 | Comamonadaceae -             | 0       | 0.1    | 4.7    | 1.8    | 11.1    | 0.7   | 2.1   | 2     | 1.1   |
|                                                 | Verrucomicrobiaceae -        | 0       | 0      | 1.5    | 6.5    | 0       | 0     | 0.1   | 6.5   | 7.9   |
|                                                 | Brevibacillaceae -           | 0       | 19.5   | 0.1    | 0.1    | 0       | 0     | 0     | 0     | 0     |
|                                                 | Chitinophagaceae -           | 0       | 0.2    | 4.3    | 4.5    | 1.8     | 1.6   | 4.4   | 1.3   | 1.4   |
|                                                 | Enterobacteriaceae -         | 6.3     | 0.3    | 0      | 0      | 0.1     | 0     | 8.3   | 2.5   | 0.8   |
|                                                 | Solimonadaceae -             | 0       | 0      | 0      | 0.8    | 0       | 2.7   | 11.9  | 1.4   | 0.7   |
|                                                 | Bacillaceae -                | 0.8     | 13.2   | 0.2    | 0.1    | 0       | 0     | 0     | 0     | 0     |
|                                                 | Rhizobiaceae -               | 0.1     | 0.4    | 2.7    | 2.2    | 1.3     | 0.2   | 1.3   | 2.7   | 3.4   |
|                                                 | Sporolactobacillaceae -      | 11.6    | 0.9    | 0      | 0      | 0.1     | 0     | 0     | 0     | 0     |
|                                                 | Terrimicrobiaceae -          | 0       | 0      | 0.1    | 0.4    | 2       | 0.3   | 2.2   | 3.6   | 2.2   |
|                                                 | Pseudomonadaceae -           | 2       | 0.2    | 2.2    | 2.7    | 0       | 0     | 0.2   | 0.9   | 2.3   |
|                                                 | Caulobacteraceae -           | 0       | 0.1    | 0.5    | 0.5    | 3.5     | 0.6   | 2.5   | 1.7   | 0.9   |
|                                                 | Micromonosporaceae -         | 0       | 10.3   | 0      | 0      | 0       | 0     | 0     | 0     | 0     |
|                                                 | Paenibacillaceae -           | 1.4     | 7.2    | 0.4    | 0.5    | 0       | 0     | 0     | 0     | 0     |
|                                                 | Ferrovibrionaceae -          | 0       | 0      | 0.1    | 1.1    | 0       | 3.6   | 2.6   | 0.8   | 0.5   |
|                                                 | Microscillaceae -            | 0       | 0.1    | 6.4    | 1.9    | 0       | 0     | 0     | 0     | 0     |
|                                                 | Bryobacteraceae -            | 0       | 0.1    | 4.4    | 2.3    | 0       | 0     | 0     | 0     | 0     |
|                                                 | Chloroplast -                | 0       | 0      | 0.1    | 0.6    | 0.1     | 0     | 0.4   | 4.7   | 0.6   |
|                                                 | Intrasporangiaceae -         | 0       | 0.1    | 2.8    | 2.5    | 0       | 0     | 0     | 0     | 0     |
|                                                 | Rhizobiales_Incertae_Sedis - | 0       | 0.1    | 1.2    | 0.7    | 0.3     | 1.1   | 0.3   | 0.2   | 1.3   |
|                                                 | Longimicrobiaceae -          | 0       | 0      | 0.9    | 4.1    | 0       | 0     | 0     | 0     | 0     |
|                                                 | Hyphomicrobiaceae -          | 0       | 0.3    | 1.2    | 1.5    | 0.2     | 0.1   | 0.5   | 0.4   | 0.5   |
|                                                 | Isosphaeraceae -             | 0       | 0      | 1.3    | 1.7    | 0.1     | 0     | 0.5   | 0.5   | 0.5   |
|                                                 | Weeksellaceae -              | 0       | 0      | 0      | 0      | 0.1     | 0     | 1.4   | 1.5   | 1.3   |
|                                                 | Gemmatimonadaceae -          | 0       | 0      | 1.7    | 2.6    | 0       | 0     | 0     | 0     | 0     |
|                                                 | Paracaedibacteraceae -       | 0       | 0.4    | 2.5    | 1.1    | 0       | 0     | 0     | 0     | 0     |
|                                                 | Azospirillaceae -            | 0       | 0      | 0.2    | 0.5    | 0.3     | 1.1   | 0.4   | 0.9   | 0.3   |
|                                                 | Nocardiodaceae -             | 0       | 0      | 0.2    | 0.5    | 0       | 0     | 0.8   | 0.9   | 1.3   |
|                                                 | Solibacteraceae -            | 0       | 1.5    | 0.9    | 1.1    | 0       | 0     | 0     | 0     | 0     |
|                                                 | Methylophilaceae -           | 0       | 0.1    | 1.9    | 1.2    | 0       | 0     | 0.2   | 0     | 0     |
|                                                 | Hyphomonadaceae -            | 0       | 0      | 0      | 0.1    | 0.7     | 0.3   | 0.8   | 0.7   | 0.8   |
|                                                 | Lachnospiraceae -            | 0       | 0      | 0.3    | 1      | 0.1     | 0     | 0.2   | 0.7   | 1     |
|                                                 | Spirosomaceae -              | 0       | 3.1    | 0      | 0      | 0       | 0     | 0     | 0     | 0     |
|                                                 | Acidobacteriales -           | 0       | 0      | 0.1    | 0.4    | 1       | 0.8   | 0.3   | 0.2   | 0.4   |
|                                                 | Fimbriimonadaceae -          | 0       | 0      | 0.6    | 0.6    | 0       | 0     | 0.2   | 1     | 0.6   |
|                                                 | Thermoactinomycetaceae -     | 0       | 0      | 2.3    | 0.6    | 0       | 0     | 0     | 0     | 0     |
|                                                 | Caedibacteraceae -           | 0       | 2.6    | 0      | 0      | 0       | 0     | 0     | 0     | 0     |
|                                                 | Burkholderiaceae -           | 0       | 0      | 0.1    | 0.4    | 0.4     | 0.4   | 0.2   | 0.3   | 0.5   |
|                                                 | Acetobacteraceae -           | 0.2     | 0      | 0.9    | 1.2    | 0       | 0     | 0     | 0     | 0     |
|                                                 | Devosiaceae -                | 0.5     | 0.1    | 0.4    | 0.7    | 0.1     | 0     | 0.1   | 0.1   | 0.2   |
|                                                 | Blastocatellaceae -          | 0       | 0      | 0.9    | 0.6    | 0.2     | 0     | 0     | 0     | 0.4   |
|                                                 | Vicinamibacteraceae -        | 0       | 0      | 1.4    | 0.7    | 0       | 0     | 0     | 0     | 0     |
|                                                 | Sphingobacteriaceae -        | 0       | 0.4    | 1      | 0.6    | 0       | 0     | 0     | 0     | 0     |
|                                                 | Micrococcaceae -             | 0       | 0      | 0.4    | 0.1    | 0.3     | 0     | 0.4   | 0.7   | 0.2   |
|                                                 | Streptomycetaceae -          | 0       | 0.1    | 1.2    | 0.3    | 0       | 0     | 0     | 0     | 0     |
|                                                 | Pedospaeraceae -             | 0       | 0.9    | 0.6    | 0      | 0       | 0     | 0     | 0     | 0     |
|                                                 | Rhodobacteraceae -           | 0       | 0.2    | 0.8    | 0.4    | 0       | 0     | 0     | 0     | 0     |
|                                                 | Methylophilaceae -           | 0       | 0      | 0.4    | 1      | 0       | 0     | 0     | 0     | 0     |
|                                                 | MB-A2-108 -                  | 0       | 0      | 0      | 0      | 1.2     | 0.1   | 0     | 0.1   | 0     |
|                                                 | Remaining taxa (345) -       | 0       | 1.3    | 0      | 0      | 0       | 0     | 0     | 0     | 0     |
|                                                 |                              | 2.5     | 27.1   | 13.7   | 7.7    | 1       | 0.2   | 1.4   | 0.9   | 1.3   |
|                                                 |                              | s       | SOD 01 | SOD 02 | SOD 03 | Bb      | PcB11 | PcB12 | PcB13 | PcB14 |

Figure S8: Heatmap showing relative abundance of top 60 family taxa identified from samples



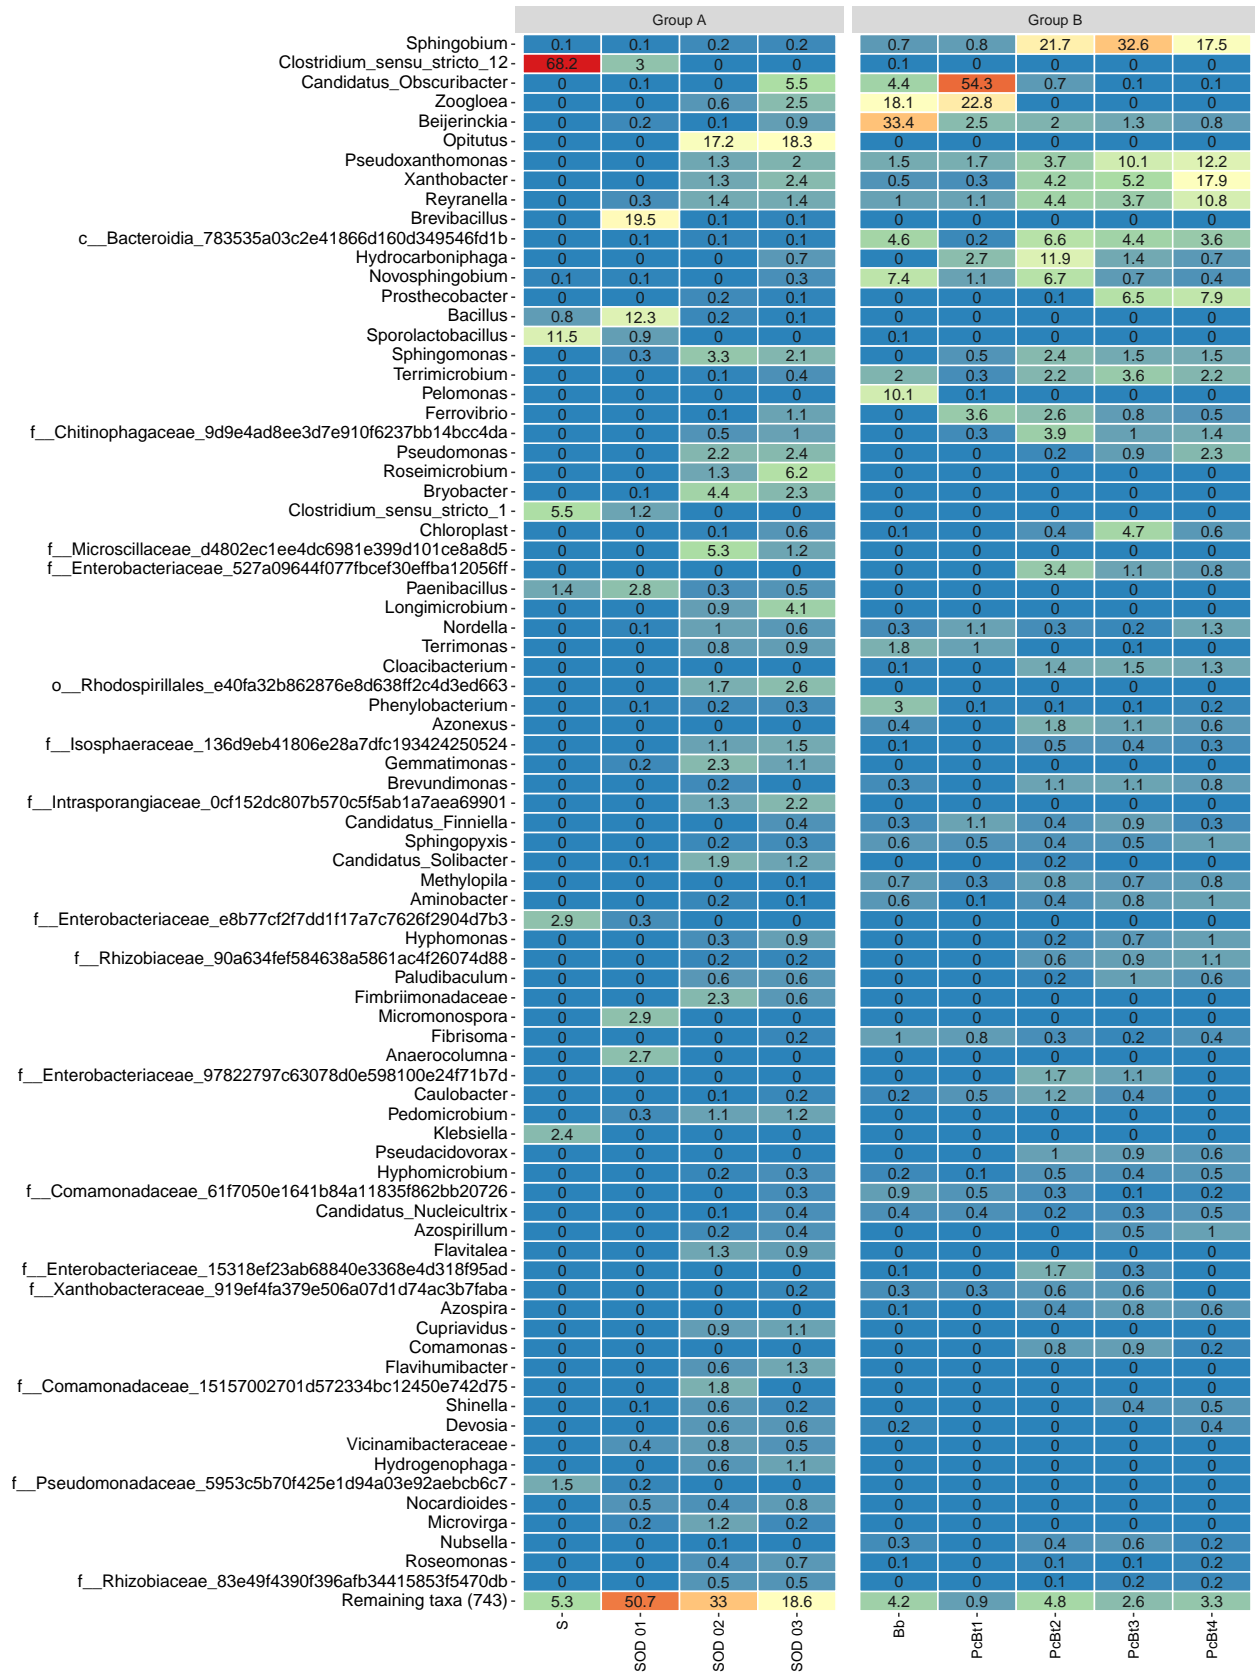

Figure S9: Heatmap showing relative abundance of top 80 genera identified from samples

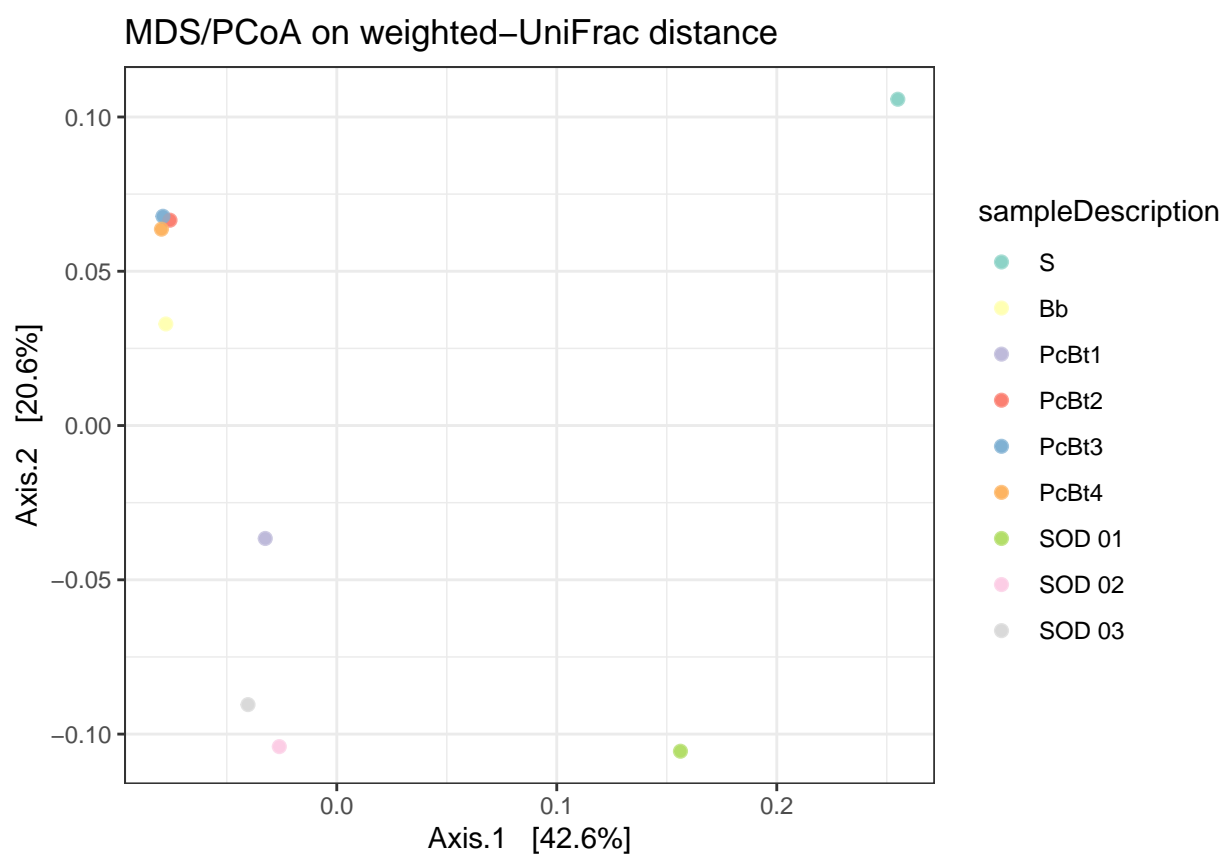

Figure S10: Principal coordinate analysis (multidimensional scaling) of distance matrix using weighted UniFrac metrics. Coordinates for axis 1 and 2 are shown in plot.

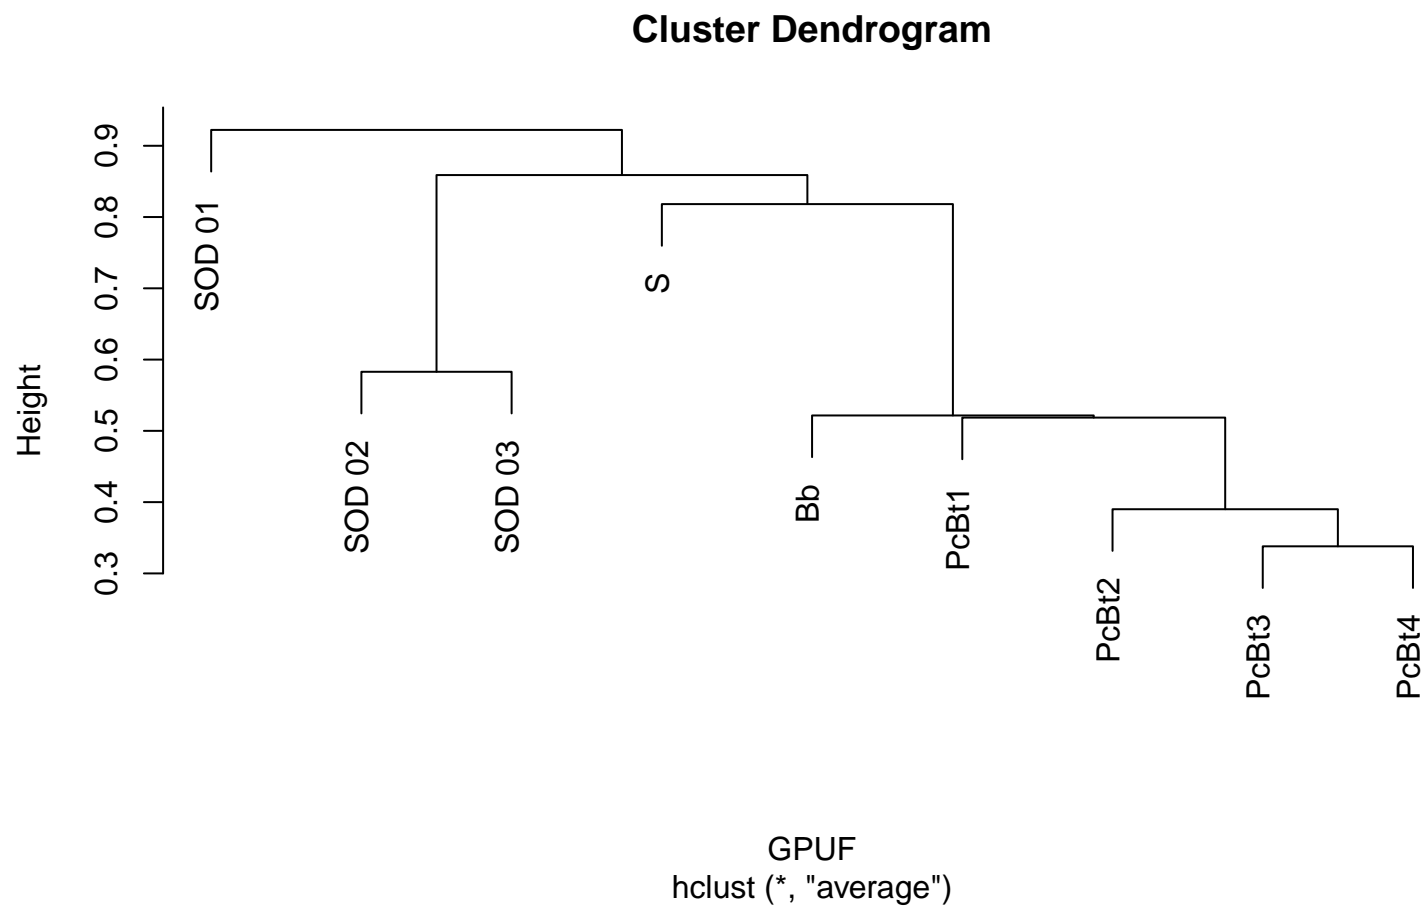

Figure S11: Hierarchical Clustering using UniFrac dissimilarity and UPGMA method.

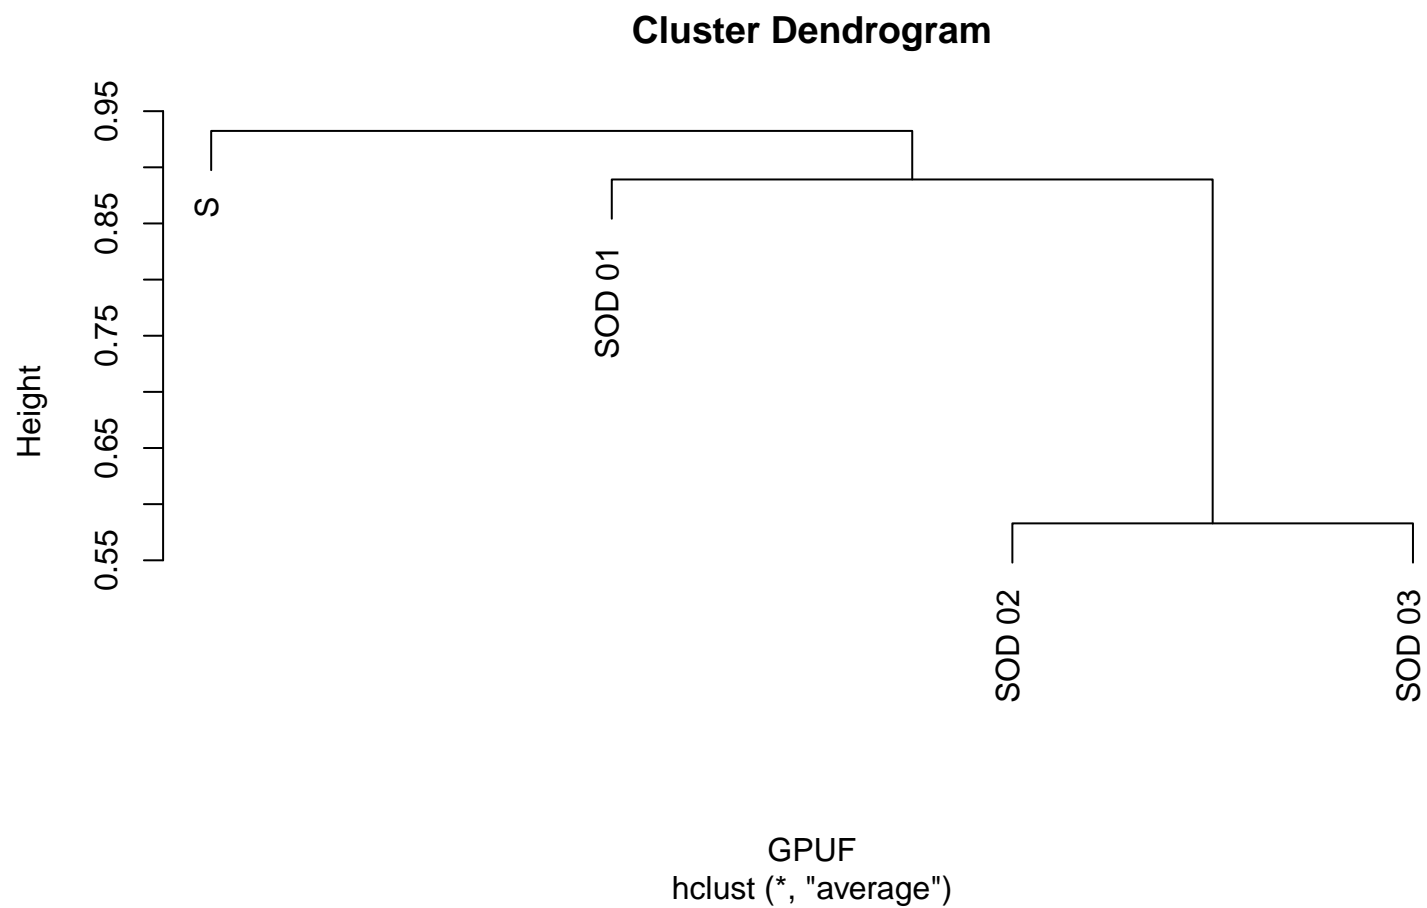

Figure S12: Hierarchical Clustering using UniFrac dissimilarity and UPGMA method of Group A sample group in the present study

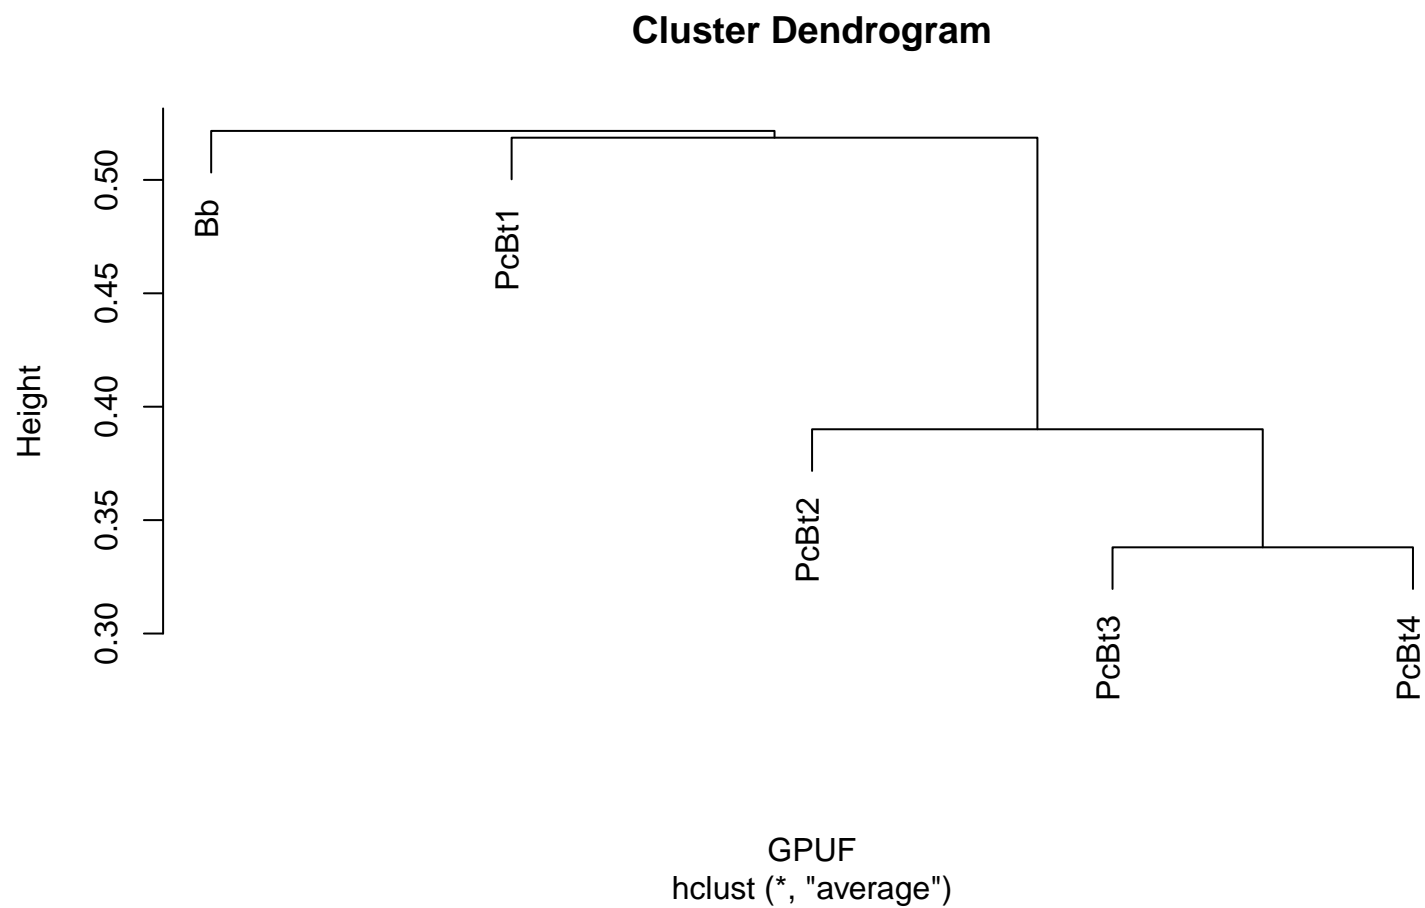

Figure S13: Hierarchical Clustering using UniFrac dissimilarity and UPGMA method of Group B sample group in the present study

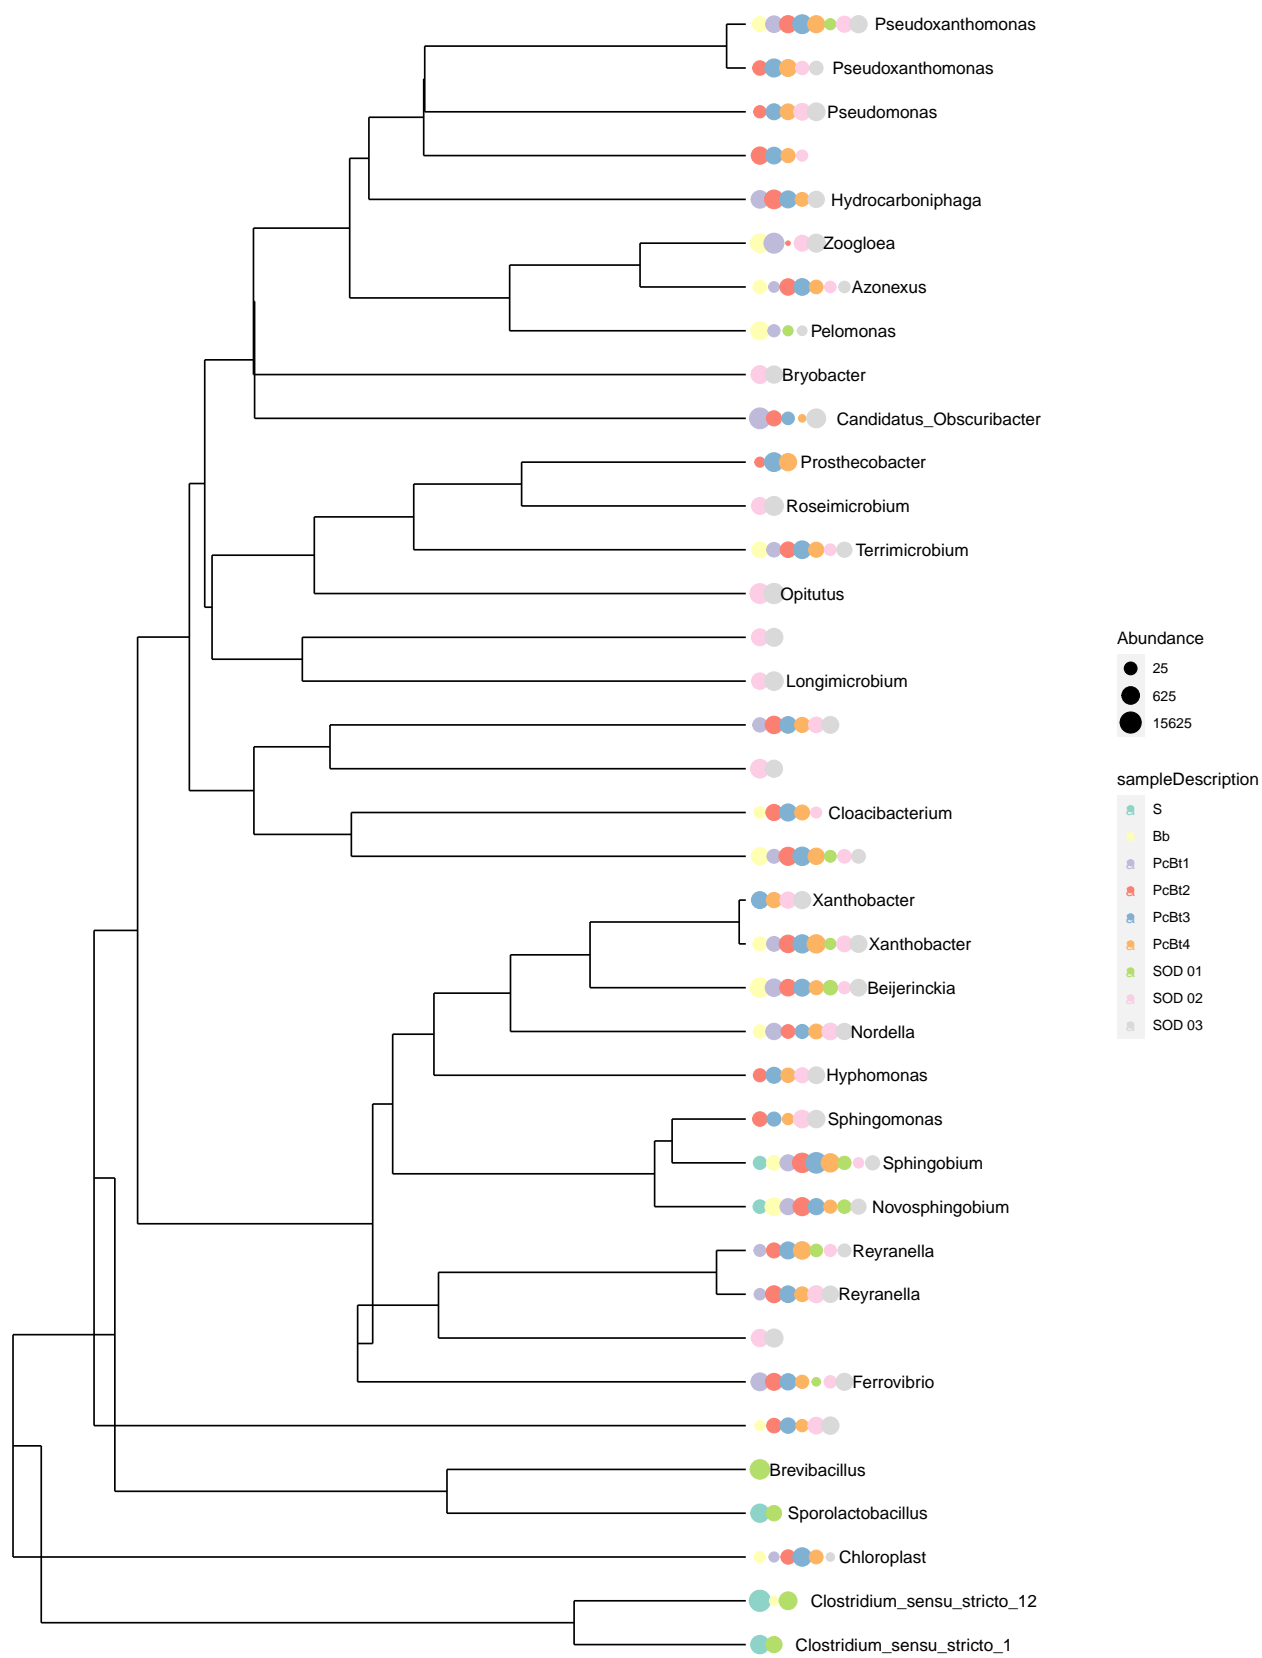

Figure S14: Phylogenetic tree using alignment and UPGMA method done in muscle64.

A

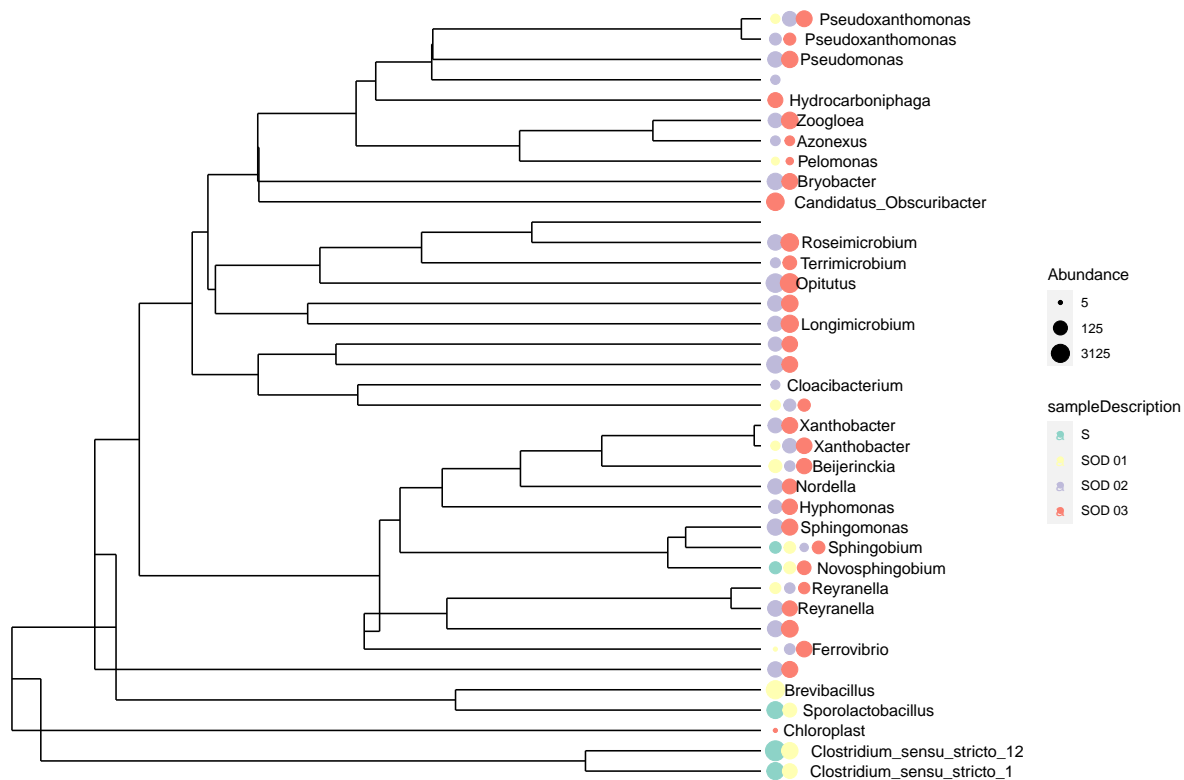

B

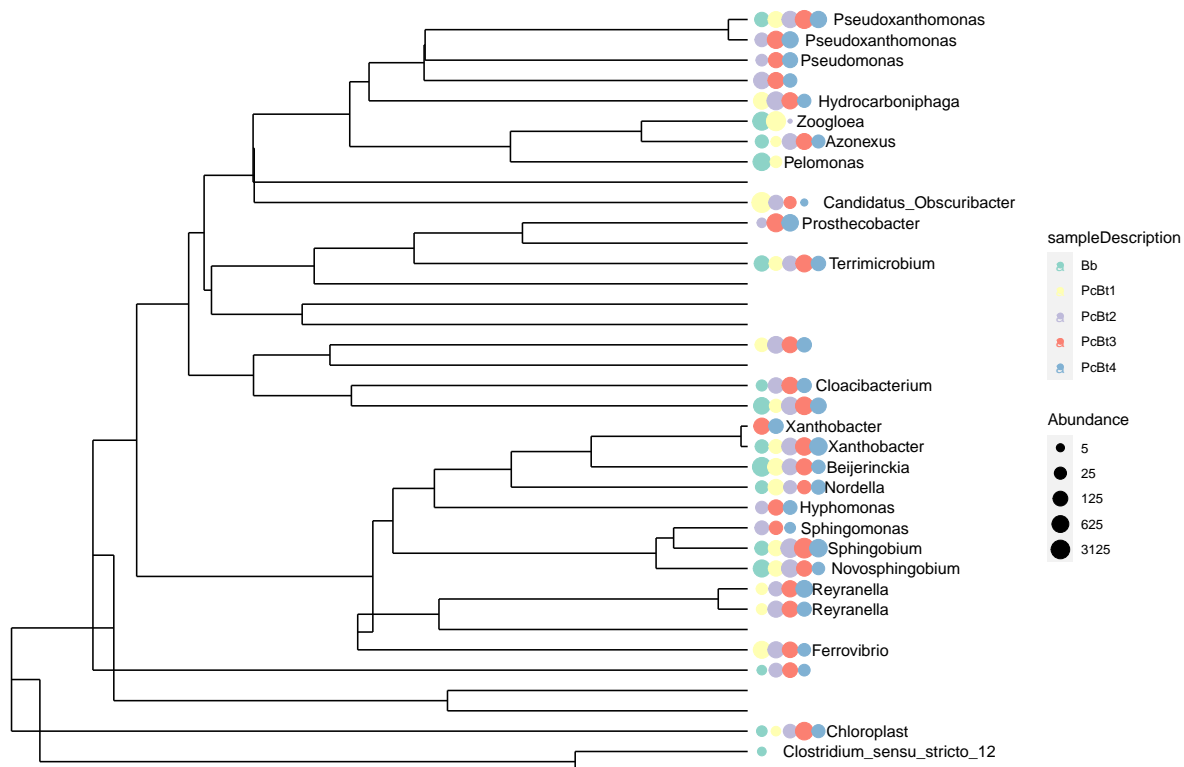

Figure S15: Phylogenetic tree using alignment and UPGMA method done in muscle64 of two sample groups in the present study

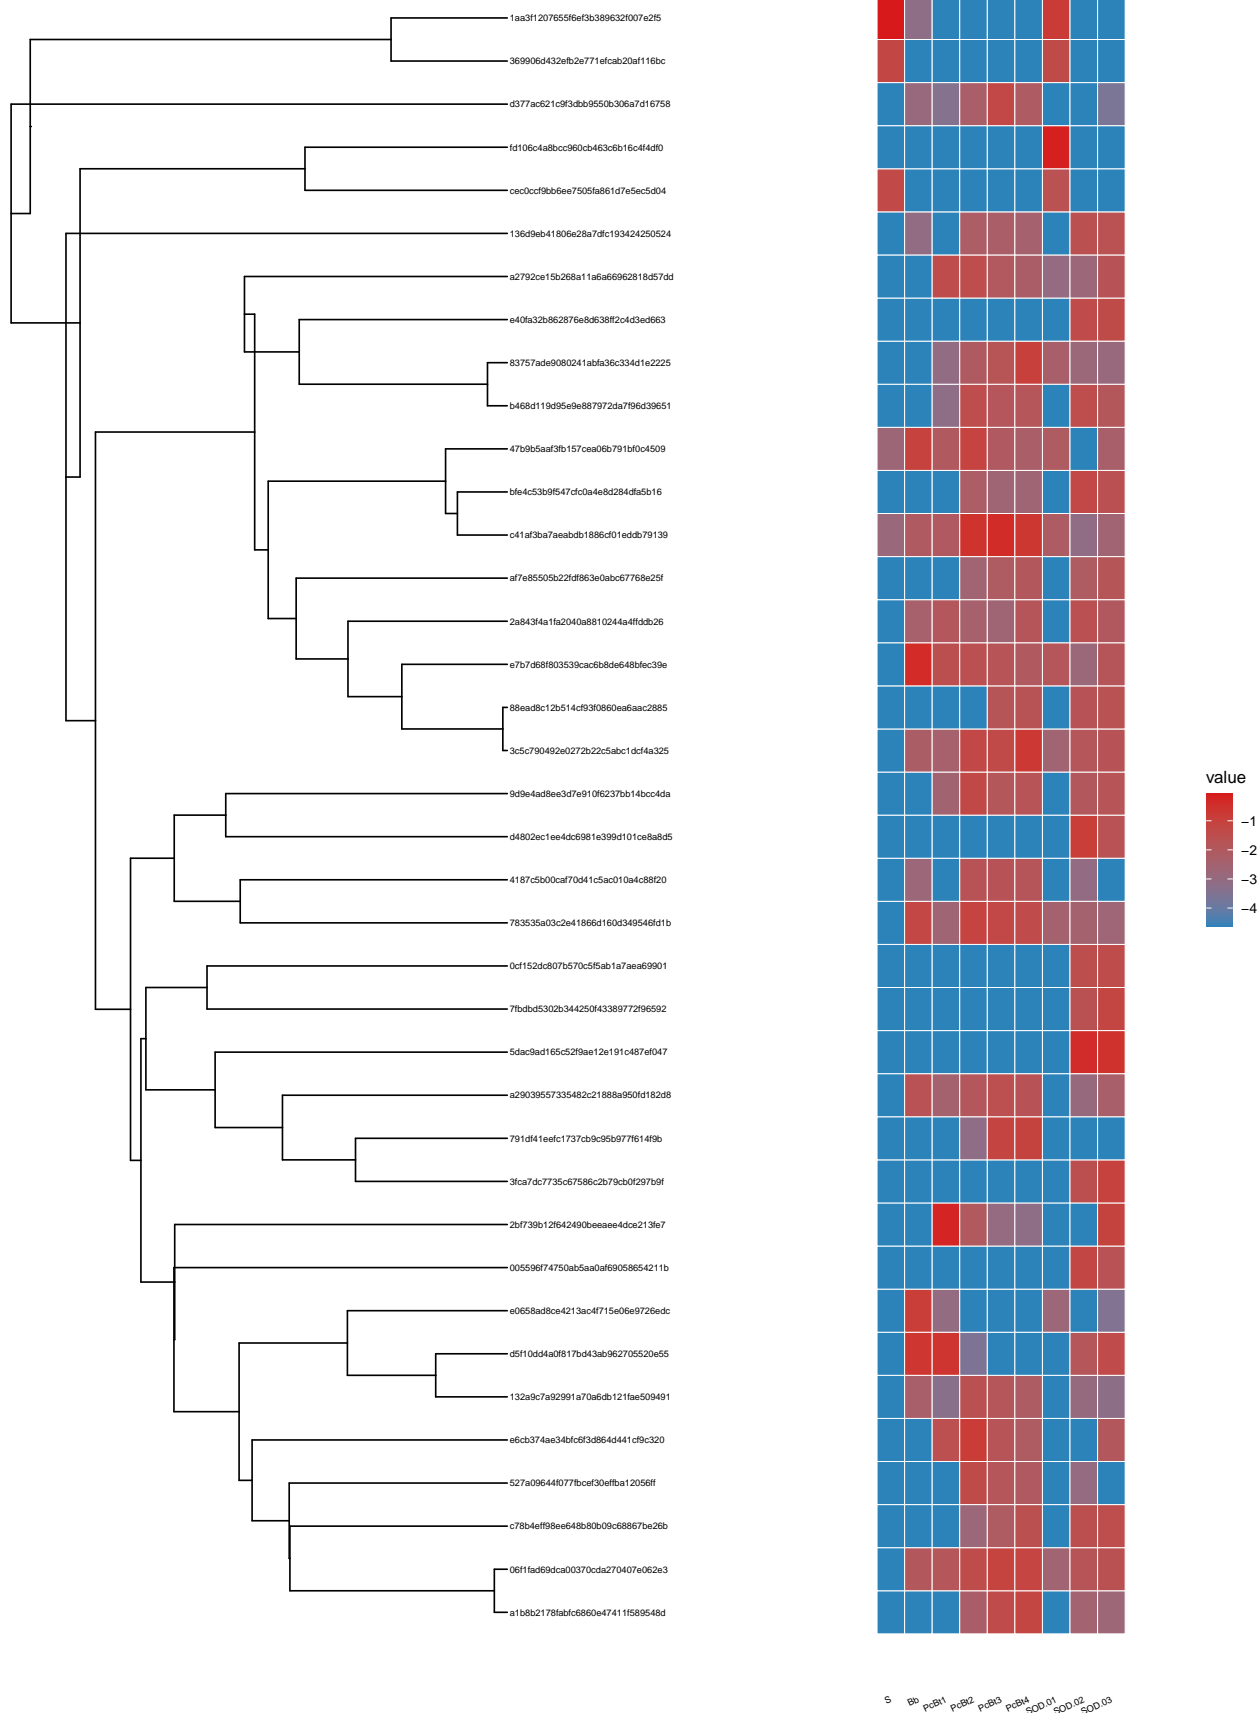

Figure S16: Combined heat map and phylogenetic tree of ASVs with  $\geq 1000$  total reads (n = 38) from samples.



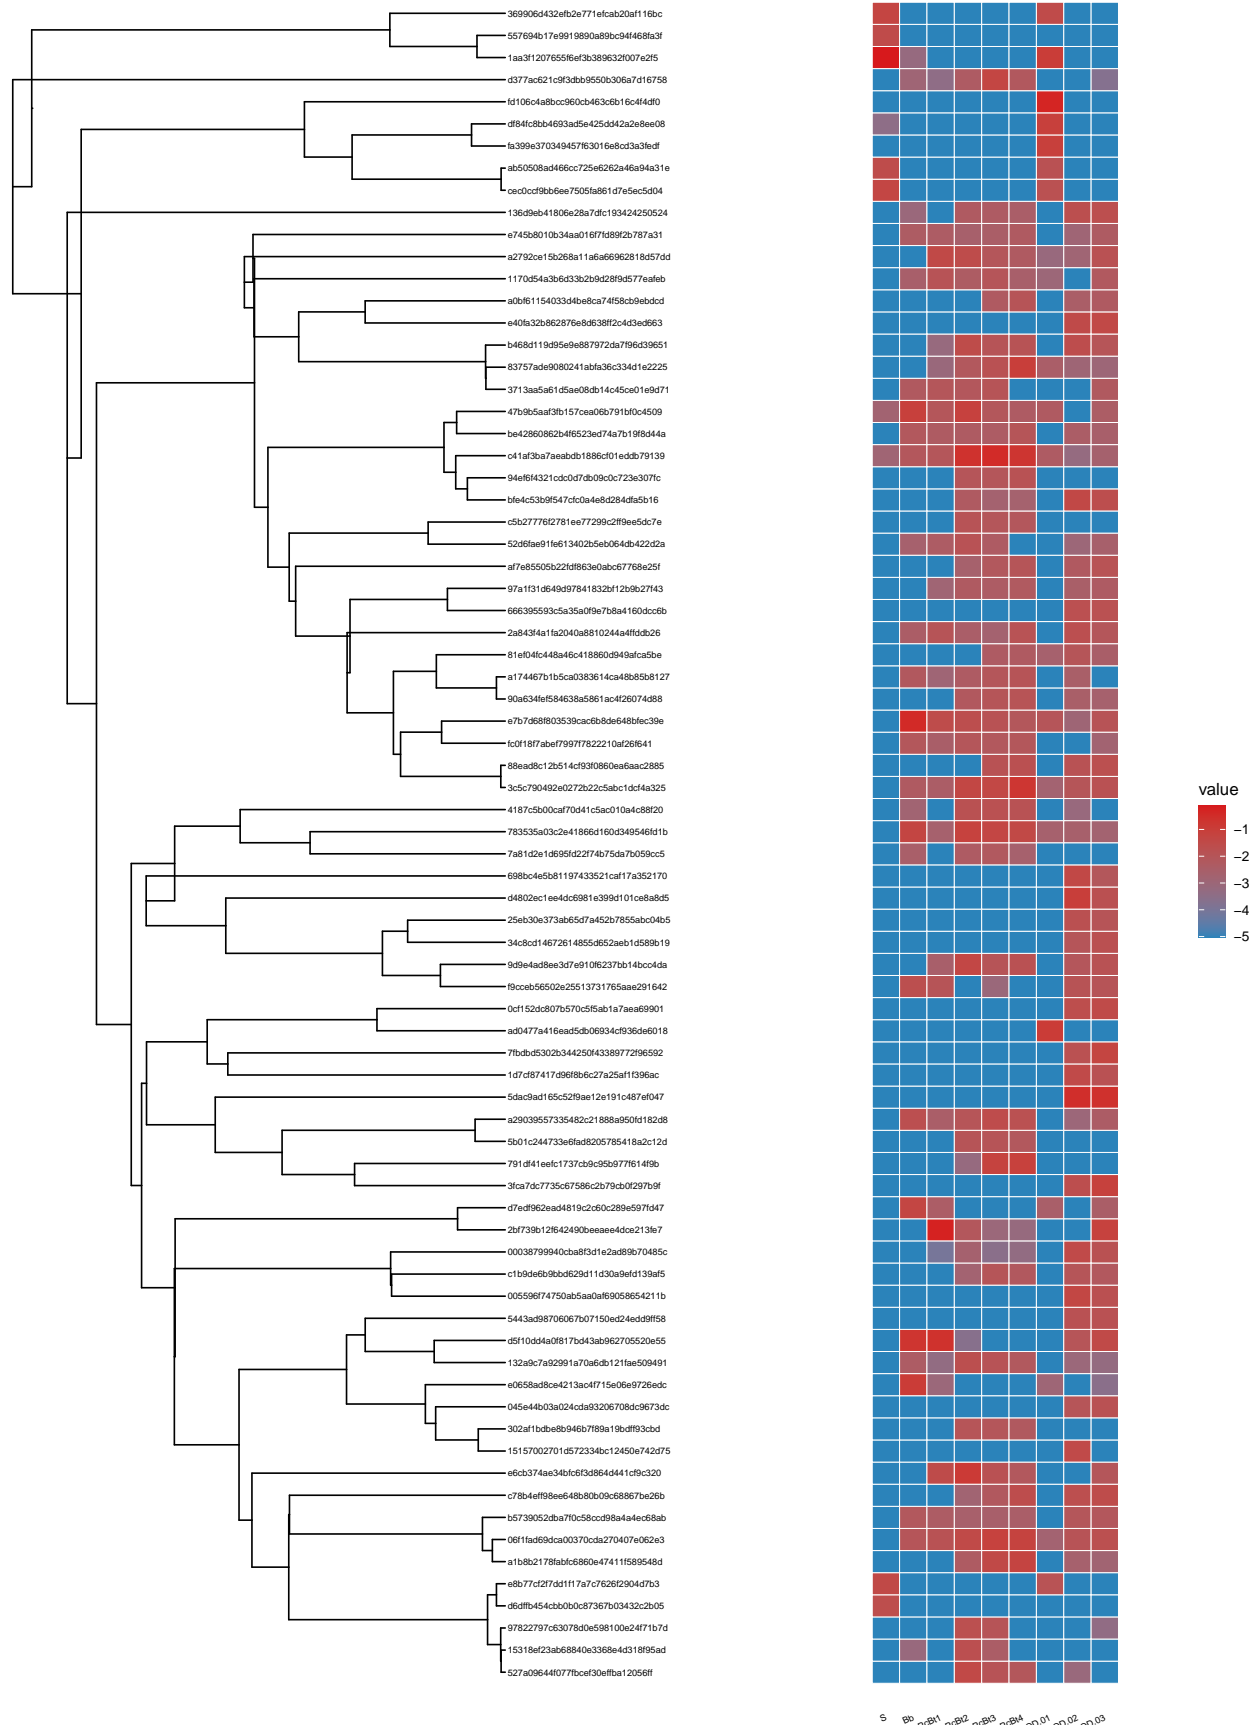

Figure S17: Combined heat map and phylogenetic tree of ASVs with  $\geq 500$  total reads( $n = 76$ ) from samples.
